# Supplementary material for: Identifying patterns of immune related cells and genes in the peripheral blood of acute myocardial infarction patients using a small cohort
Source: J Transl Med. 2022 Jul 21;20:321. doi: 10.1186/s12967-022-03517-1 (PMC9306178; doi:10.1186/s12967-022-03517-1)
Supplement: Supplementary file 7 — Additional file 7: Table S6. The GS values as well as corresponding p values of 1171 genes in the salmon module. [file 12967_2022_3517_MOESM7_ESM.xls]

## Sheet: Additional Table S6
geneSymbol	moduleColor	GS.Bcellsmemory	p.GS.Bcellsmemory
PGLYRP1	salmon	0.744767	2.98981e-05
PGM2	salmon	0.740602	3.49673e-05
CDA	salmon	0.734666	4.34975e-05
TGFA	salmon	0.726611	5.79747e-05
CLEC4D	salmon	0.723556	6.44836e-05
DOK3	salmon	0.719467	7.41938e-05
SEC22L1	salmon	0.709203	0.000104425
DIRC2	salmon	0.706338	0.000114584
LIN7A	salmon	0.705952	0.000116019
YIPF1	salmon	0.705318	0.000118408
CXCL16	salmon	0.704165	0.000122859
C11orf56	salmon	0.703767	0.000124433
GAA	salmon	0.703727	0.00012459
CKAP4	salmon	0.703053	0.000127292
NOD9	salmon	0.702622	0.000129047
FBXL5	salmon	0.700724	0.000137031
FLJ22662	salmon	0.700401	0.000138432
IFT20	salmon	0.700168	0.000139451
BMX	salmon	0.699475	0.000142521
AGTPBP1	salmon	0.697282	0.000152617
ENTPD1	salmon	0.694812	0.000164736
ARHGAP24	salmon	0.69474	0.0001651
BCL3	salmon	0.694377	0.000166958
TXNDC13	salmon	0.692723	0.000175633
NUMB	salmon	0.689111	0.000195958
C22orf5	salmon	0.689105	0.000195995
MYL6	salmon	0.688871	0.000197382
FBXL20	salmon	0.68784	0.000203586
C1RL	salmon	0.686886	0.000209477
TGM3	salmon	0.686682	0.000210756
EXT1	salmon	0.686192	0.000213857
PDZD8	salmon	0.686179	0.00021394
ZDHHC3	salmon	0.685774	0.000216529
KIAA2013	salmon	0.681967	0.000242276
MCEMP1	salmon	0.679505	0.000260307
PHF21A	salmon	0.679424	0.000260925
KPNA1	salmon	0.679	0.000264148
C20orf3	salmon	0.678249	0.000269949
RBPSUH	salmon	0.677451	0.000276235
TALDO1	salmon	0.675898	0.000288832
FAM11B	salmon	0.675708	0.000290406
LOC653117	salmon	0.674479	0.000300774
MXD3	salmon	0.674431	0.000301188
ZNF20	salmon	0.674093	0.000304103
ZNF537	salmon	0.673687	0.000307625
IRAK3	salmon	0.673282	0.000311186
ORF1-FL49	salmon	0.672761	0.000315809
PFKFB3	salmon	0.672512	0.000318044
BNIP2	salmon	0.671362	0.000328534
F5	salmon	0.67015	0.000339908
SLC15A3	salmon	0.669269	0.000348396
YPEL5	salmon	0.668536	0.000355595
ANKS1A	salmon	0.668085	0.00036008
HLX1	salmon	0.668018	0.000360757
SLC6A6	salmon	0.666205	0.00037934
CARD12	salmon	0.665952	0.000382004
PLOD1	salmon	0.664751	0.000394846
PTEN	salmon	0.663054	0.000413631
GBA	salmon	0.662349	0.000421668
APOB48R	salmon	0.661729	0.000428838
SART2	salmon	0.660555	0.000442708
RTN3	salmon	0.659819	0.000451605
RALB	salmon	0.658927	0.000462588
CYBRD1	salmon	0.657416	0.000481732
OACT1	salmon	0.657283	0.000483438
ZFP106	salmon	0.656828	0.000489359
MMP9	salmon	0.656309	0.000496174
DNM2	salmon	0.656272	0.000496665
OSCAR	salmon	0.655615	0.000505431
TNFRSF10C	salmon	0.655154	0.000511652
ARID3A	salmon	0.655004	0.000513691
CD82	salmon	0.654661	0.000518391
NFYC	salmon	0.654273	0.000523736
MTHFS	salmon	0.654243	0.000524153
GLT1D1	salmon	0.653917	0.000528698
ATP6V1C1	salmon	0.653698	0.000531761
JARID1B	salmon	0.653296	0.00053743
TLE3	salmon	0.652341	0.000551102
RAB5A	salmon	0.651697	0.000560502
TMPIT	salmon	0.651545	0.000562733
PFKFB2	salmon	0.651542	0.000562788
HSPBAP1	salmon	0.650741	0.000574696
MAPK1	salmon	0.649035	0.000600805
CXorf23	salmon	0.648583	0.000607905
RAB31	salmon	0.648498	0.000609234
FAM101B	salmon	0.648221	0.000613633
MOSC1	salmon	0.648067	0.000616069
B4GALT5	salmon	0.647963	0.000617736
FRAT1	salmon	0.647065	0.000632239
ALOX5AP	salmon	0.645948	0.000650665
SLC36A1	salmon	0.645586	0.000656753
WAS	salmon	0.643968	0.000684492
RASSF2	salmon	0.643875	0.000686125
POR	salmon	0.643166	0.00069862
STXBP5	salmon	0.642029	0.000719081
BASP1	salmon	0.64187	0.00072198
PLEKHM1	salmon	0.641042	0.000737264
FLJ10357	salmon	0.640342	0.000750388
CANT1	salmon	0.640156	0.000753921
TBC1D14	salmon	0.639134	0.000773529
HMFN0839	salmon	0.63887	0.000778649
RGS14	salmon	0.638577	0.000784399
ETS2	salmon	0.638459	0.000786712
OACT5	salmon	0.638202	0.00079178
HBP1	salmon	0.637271	0.000810403
KIAA0963	salmon	0.637203	0.000811777
ARFGAP3	salmon	0.63645	0.000827121
SEMA4A	salmon	0.636432	0.000827508
IL8RA	salmon	0.636116	0.000834021
NUDT16	salmon	0.635795	0.000840696
MGC23280	salmon	0.635715	0.000842359
NSMAF	salmon	0.633488	0.000889967
CUEDC1	salmon	0.633255	0.000895082
CCPG1	salmon	0.63306	0.000899373
RAB1A	salmon	0.632841	0.000904222
LBR	salmon	0.632268	0.000917016
MAP4K4	salmon	0.631946	0.000924271
PPP1R3D	salmon	0.631899	0.000925344
EIF4E3	salmon	0.631838	0.000926737
PGD	salmon	0.630966	0.000946666
AGPAT2	salmon	0.630468	0.000958231
KIF1B	salmon	0.630419	0.000959372
SLCO3A1	salmon	0.629918	0.000971133
CTNNA1	salmon	0.62934	0.000984848
MGC39518	salmon	0.629171	0.000988894
SH3BP5L	salmon	0.629155	0.000989284
HCK	salmon	0.62869	0.00100048
GNB2	salmon	0.628648	0.00100151
MKNK1	salmon	0.628172	0.0010131
PTPRE	salmon	0.627408	0.00103194
PRG1	salmon	0.626911	0.00104436
SLC31A2	salmon	0.626877	0.00104521
DGAT1	salmon	0.626699	0.0010497
VMD2	salmon	0.626517	0.00105429
SRPK1	salmon	0.625935	0.00106911
MSL3L1	salmon	0.62574	0.00107412
SLC11A1	salmon	0.625589	0.00107801
WIPI1	salmon	0.625564	0.00107866
NALP12	salmon	0.62468	0.00110171
LOC645058	salmon	0.624355	0.00111027
LOC340527	salmon	0.62433	0.00111095
DOCK5	salmon	0.623727	0.001127
CHUK	salmon	0.623025	0.00114596
MGAM	salmon	0.62243	0.00116227
AQP9	salmon	0.622302	0.00116578
PPP2R2A	salmon	0.622249	0.00116725
PDLIM7	salmon	0.621719	0.00118198
ORM2	salmon	0.621375	0.00119161
HK3	salmon	0.621101	0.00119935
MGC3123	salmon	0.620693	0.00121093
IQSEC1	salmon	0.620672	0.00121153
PHTF1	salmon	0.620549	0.00121505
RIT1	salmon	0.620478	0.00121706
TLR8	salmon	0.619891	0.001234
ZMPSTE24	salmon	0.619095	0.00125726
CPD	salmon	0.618239	0.00128268
ITGAM	salmon	0.617907	0.00129265
TREML2	salmon	0.617588	0.00130231
UBTD1	salmon	0.616928	0.00132248
TLR4	salmon	0.616869	0.00132427
PDK3	salmon	0.616864	0.00132444
SEPX1	salmon	0.616858	0.00132464
PSENEN	salmon	0.616855	0.00132472
XPO6	salmon	0.616678	0.00133019
ZBED1	salmon	0.616374	0.00133962
SFXN5	salmon	0.616355	0.0013402
CTDP1	salmon	0.615789	0.00135789
DAPK2	salmon	0.615591	0.00136416
CAB39	salmon	0.614993	0.00138314
ZMYND15	salmon	0.614922	0.00138543
PRKAR1A	salmon	0.614836	0.00138815
ZNF143	salmon	0.614228	0.00140777
HSPA1L	salmon	0.614016	0.00141466
C6orf32	salmon	0.613266	0.0014393
PTAFR	salmon	0.612365	0.00146936
OBFC2A	salmon	0.612162	0.00147619
ROPN1L	salmon	0.611983	0.00148227
AATK	salmon	0.611965	0.00148287
ADAM8	salmon	0.611615	0.00149479
C7orf25	salmon	0.611371	0.00150314
MAPK3	salmon	0.611365	0.00150332
QPCT	salmon	0.611222	0.00150827
APBB1IP	salmon	0.611126	0.00151156
USP9X	salmon	0.61095	0.00151765
IRS2	salmon	0.610483	0.00153388
DGAT2	salmon	0.610328	0.00153931
ARPC3	salmon	0.61006	0.00154871
LOC284757	salmon	0.609334	0.00157446
SIGLEC9	salmon	0.609108	0.00158253
RBM23	salmon	0.609042	0.00158491
ZFAND3	salmon	0.608586	0.00160135
DYSF	salmon	0.608422	0.00160729
LOC643313	salmon	0.608221	0.00161462
IRAK4	salmon	0.60821	0.00161502
LPPR2	salmon	0.608124	0.00161818
DREV1	salmon	0.608011	0.00162231
CEBPA	salmon	0.607678	0.00163454
PPP3R1	salmon	0.60732	0.00164778
CLEC4E	salmon	0.607296	0.00164866
SLC22A4	salmon	0.606673	0.00167193
SPI1	salmon	0.606552	0.00167649
PLD1	salmon	0.606196	0.00168996
RHOG	salmon	0.606103	0.00169347
EIF2C4	salmon	0.605947	0.00169944
SERPINB1	salmon	0.604892	0.00174002
TMEM16K	salmon	0.604745	0.00174575
REPS2	salmon	0.604156	0.00176885
C1orf119	salmon	0.60408	0.00177187
TPST1	salmon	0.603276	0.00180385
GMIP	salmon	0.602999	0.001815
MIER1	salmon	0.602977	0.00181588
ATG7	salmon	0.602919	0.00181821
CHMP2A	salmon	0.602834	0.00182166
LOC126208	salmon	0.602822	0.00182213
FEM1C	salmon	0.602693	0.00182738
CHIC2	salmon	0.602535	0.0018338
TMEM8	salmon	0.602412	0.00183879
PPM1M	salmon	0.602312	0.00184287
KLHL21	salmon	0.60144	0.00187878
USP3	salmon	0.601434	0.00187904
ATP6V0B	salmon	0.601074	0.00189401
MGRN1	salmon	0.60059	0.00191437
RFWD2	salmon	0.600534	0.00191671
TKT	salmon	0.600524	0.00191714
AHCTF1	salmon	0.600157	0.00193271
FLJ10986	salmon	0.600152	0.00193291
ATG16L2	salmon	0.600147	0.00193311
SYK	salmon	0.599891	0.00194406
GNG5	salmon	0.59957	0.00195781
ST8SIA4	salmon	0.598462	0.00200594
LOC391257	salmon	0.598458	0.00200613
LOC255809	salmon	0.59822	0.0020166
STX3A	salmon	0.597685	0.0020403
SMAP1L	salmon	0.597149	0.00206433
CBS	salmon	0.596231	0.00210596
LITAF	salmon	0.596078	0.00211296
DDEF1	salmon	0.595788	0.00212632
IL18R1	salmon	0.595657	0.00213237
CFLAR	salmon	0.595246	0.00215145
MON1B	salmon	0.595092	0.00215866
TSEN34	salmon	0.595051	0.00216054
LILRB3	salmon	0.59496	0.00216484
CDK5R1	salmon	0.594715	0.00217634
CA4	salmon	0.594225	0.00219951
TBC1D15	salmon	0.593061	0.00225537
GAB2	salmon	0.592682	0.00227381
IFNGR2	salmon	0.592651	0.00227531
IGSF6	salmon	0.592598	0.0022779
RBP7	salmon	0.592449	0.00228522
PHC2	salmon	0.592356	0.00228978
C6orf166	salmon	0.59225	0.00229498
PREX1	salmon	0.591599	0.00232725
NDUFB3	salmon	0.591537	0.00233034
RFP	salmon	0.591401	0.00233711
ELL	salmon	0.591271	0.00234363
ABHD2	salmon	0.59122	0.00234616
RAB32	salmon	0.591082	0.00235312
TP53INP2	salmon	0.590944	0.00236007
PADI4	salmon	0.590391	0.00238809
POLR2C	salmon	0.590278	0.00239386
FAM49A	salmon	0.590237	0.00239591
TLR2	salmon	0.590127	0.00240155
RASSF3	salmon	0.590111	0.00240238
RNF149	salmon	0.590023	0.00240691
PTPNS1	salmon	0.589545	0.0024315
RAB3D	salmon	0.589126	0.00245325
IFNGR1	salmon	0.588922	0.00246389
LENG4	salmon	0.588409	0.00249086
GPR97	salmon	0.587966	0.00251435
ABHD4	salmon	0.586605	0.00258764
C20orf177	salmon	0.586491	0.00259385
EFCBP2	salmon	0.586415	0.00259801
EDG6	salmon	0.586347	0.00260176
ATP6V1A	salmon	0.586338	0.00260223
LTBR	salmon	0.586033	0.00261898
TYROBP	salmon	0.585939	0.00262419
MBD6	salmon	0.585201	0.00266514
P2RX1	salmon	0.584961	0.00267858
FLJ14001	salmon	0.584898	0.00268215
RRAGD	salmon	0.584897	0.0026822
SLC37A3	salmon	0.584781	0.0026887
MLF2	salmon	0.584759	0.00268996
C20orf43	salmon	0.584536	0.00270257
SVIL	salmon	0.583826	0.00274297
NDEL1	salmon	0.583651	0.00275299
LOC649377	salmon	0.58262	0.00281278
MANSC1	salmon	0.582281	0.00283267
RNASE6	salmon	0.581847	0.00285831
FLOT2	salmon	0.581808	0.00286067
GNAI2	salmon	0.581284	0.00289188
APS	salmon	0.581254	0.00289368
OSBPL2	salmon	0.580901	0.00291491
LOC90355	salmon	0.580489	0.00293985
ST3GAL4	salmon	0.580386	0.00294614
CEACAM4	salmon	0.580248	0.00295452
IL17R	salmon	0.579996	0.00296993
MED12	salmon	0.579986	0.00297055
ERGIC1	salmon	0.579721	0.00298684
SUPT4H1	salmon	0.579075	0.00302686
FGR	salmon	0.579045	0.00302872
ARHGAP19	salmon	0.578997	0.0030317
LRG1	salmon	0.578933	0.0030357
PELI2	salmon	0.578595	0.00305685
SLA	salmon	0.578277	0.00307689
LOC641710	salmon	0.578257	0.00307817
CNOT3	salmon	0.578196	0.00308198
LOC651738	salmon	0.578147	0.00308512
MTF1	salmon	0.578099	0.00308817
IGF2R	salmon	0.577891	0.00310134
PGM1	salmon	0.577623	0.00311842
G6PD	salmon	0.577608	0.00311935
KLHL8	salmon	0.577435	0.00313046
ZDHHC18	salmon	0.577378	0.00313409
SLC9A8	salmon	0.577118	0.00315082
ST3GAL2	salmon	0.57688	0.00316615
LRP10	salmon	0.576841	0.00316871
OSBPL9	salmon	0.576362	0.00319982
STAT3	salmon	0.576103	0.00321676
ARG1	salmon	0.575459	0.00325924
HECW2	salmon	0.574838	0.00330062
SCYL1	salmon	0.574631	0.00331453
RNF103	salmon	0.574123	0.00334883
MKNK2	salmon	0.573204	0.00341164
ZNF18	salmon	0.572712	0.00344571
SPATA5L1	salmon	0.572643	0.00345053
CEBPD	salmon	0.572286	0.00347538
ULK1	salmon	0.572188	0.0034823
GDPD3	salmon	0.572182	0.00348267
ISG20L2	salmon	0.571864	0.00350504
TXNDC3	salmon	0.571748	0.00351324
CD2BP2	salmon	0.571522	0.00352922
RGS19	salmon	0.571403	0.00353768
MSRB2	salmon	0.571315	0.00354395
NUP153	salmon	0.570166	0.00362652
MMP25	salmon	0.569132	0.00370221
IFNAR1	salmon	0.568958	0.00371506
HMGB2	salmon	0.568488	0.00374997
PCNX	salmon	0.568176	0.00377336
MGC14376	salmon	0.568168	0.00377392
CRISPLD2	salmon	0.567745	0.00380581
RABGEF1	salmon	0.567444	0.00382859
FPR1	salmon	0.567357	0.00383523
SLCO4C1	salmon	0.567199	0.00384726
ZNF438	salmon	0.567109	0.00385414
UNC13D	salmon	0.566928	0.00386797
TBL1X	salmon	0.566401	0.00390855
EGFL5	salmon	0.566227	0.00392196
C6orf72	salmon	0.566064	0.00393462
DUSP18	salmon	0.565949	0.00394361
LOC201175	salmon	0.565808	0.00395459
SPAG9	salmon	0.565763	0.00395809
LOC644113	salmon	0.565585	0.003972
SPTLC2	salmon	0.565567	0.0039734
VNN1	salmon	0.565458	0.003982
MAST3	salmon	0.565414	0.00398541
MAK	salmon	0.56539	0.00398731
SLC19A1	salmon	0.564806	0.00403341
VPS37B	salmon	0.564785	0.00403508
GPR84	salmon	0.564776	0.0040358
CR1	salmon	0.564252	0.00407763
MGC18216	salmon	0.564092	0.00409048
MARCKS	salmon	0.56378	0.00411554
C1orf24	salmon	0.56368	0.00412369
RAF1	salmon	0.563455	0.00414188
PARP16	salmon	0.562826	0.0041932
NARF	salmon	0.562661	0.00420673
PRAM1	salmon	0.562609	0.00421102
FKBP5	salmon	0.562432	0.00422559
EXTL3	salmon	0.562413	0.00422716
BAZ1A	salmon	0.562206	0.00424428
FCGRT	salmon	0.562147	0.00424916
ADAM19	salmon	0.56204	0.00425805
RAB24	salmon	0.56177	0.00428057
DGCR2	salmon	0.561721	0.00428463
DENND3	salmon	0.561514	0.00430195
SOCS3	salmon	0.561029	0.00434276
EP300	salmon	0.560937	0.00435059
TSPAN2	salmon	0.560732	0.00436789
C17orf62	salmon	0.560689	0.0043716
GALNACT-2	salmon	0.560683	0.00437211
CAMKK2	salmon	0.560211	0.0044123
GALNAC4S-6ST	salmon	0.559992	0.00443111
HIVEP1	salmon	0.559513	0.00447246
IL13RA1	salmon	0.559414	0.00448105
LOC441268	salmon	0.559376	0.00448434
ARHGDIB	salmon	0.558892	0.00452648
KIAA0913	salmon	0.558746	0.00453924
DHRS7	salmon	0.558722	0.00454136
SHKBP1	salmon	0.558313	0.00457737
SORT1	salmon	0.558179	0.00458916
B3GNTL1	salmon	0.558162	0.00459068
FLJ11259	salmon	0.557949	0.00460961
IL1R2	salmon	0.557934	0.00461095
JMJD2B	salmon	0.557873	0.00461632
GK	salmon	0.557528	0.00464711
LOC646424	salmon	0.557267	0.00467052
SLC44A2	salmon	0.557192	0.00467721
USP4	salmon	0.557149	0.00468106
ECHDC3	salmon	0.556819	0.00471083
TREM1	salmon	0.556329	0.00475532
LOC654052	salmon	0.556284	0.0047595
JMJD1B	salmon	0.556277	0.00476013
ZNF281	salmon	0.556272	0.00476051
MTX1	salmon	0.555445	0.00483655
SLC22A17	salmon	0.555289	0.00485101
C13orf18	salmon	0.555213	0.00485805
LYN	salmon	0.555112	0.00486741
RNF24	salmon	0.554977	0.00487998
APH1B	salmon	0.554616	0.00491368
GRK6	salmon	0.554502	0.00492442
DHRS7B	salmon	0.554175	0.00495518
RHOT1	salmon	0.554018	0.00497004
ORM1	salmon	0.55359	0.00501066
TMEM88	salmon	0.553257	0.00504241
CDC2L6	salmon	0.552962	0.00507077
FLJ14166	salmon	0.552802	0.00508622
DDX26	salmon	0.552543	0.00511122
DNAJC3	salmon	0.552395	0.00512554
TMCO3	salmon	0.552178	0.00514668
MAOA	salmon	0.551427	0.00522026
PRO0149	salmon	0.550583	0.00530403
CPEB4	salmon	0.550093	0.00535317
MAP3K3	salmon	0.549613	0.00540178
LAPTM5	salmon	0.548825	0.00548217
ANXA11	salmon	0.548508	0.00551478
LOC402176	salmon	0.54684	0.00568931
PROK2	salmon	0.546827	0.00569066
CARD15	salmon	0.546715	0.00570257
RNF13	salmon	0.546707	0.00570341
ST6GALNAC2	salmon	0.546651	0.00570933
ALOX5	salmon	0.546488	0.00572668
C8orf1	salmon	0.545789	0.00580158
SLC2A3	salmon	0.545767	0.00580401
BTBD14A	salmon	0.545718	0.00580925
LOC152195	salmon	0.545681	0.00581325
NCF4	salmon	0.545109	0.00587523
COPB2	salmon	0.544939	0.0058938
RAB6IP1	salmon	0.544774	0.0059118
FAM53C	salmon	0.544558	0.00593548
FRAT2	salmon	0.54428	0.00596606
LOC642342	salmon	0.544036	0.00599298
SSH2	salmon	0.543521	0.00605022
TLR5	salmon	0.543188	0.00608746
IVNS1ABP	salmon	0.542624	0.00615103
LASS5	salmon	0.542078	0.00621304
RGL2	salmon	0.542059	0.00621521
TXNRD1	salmon	0.541813	0.00624335
CNTNAP3	salmon	0.541662	0.00626062
CORO7	salmon	0.541589	0.00626902
SLC12A9	salmon	0.541436	0.00628667
ZNF586	salmon	0.541367	0.00629458
CEBPB	salmon	0.540869	0.00635226
CCDC28A	salmon	0.540605	0.00638305
BCL6	salmon	0.540139	0.00643755
OXER1	salmon	0.538796	0.00659701
RENT1	salmon	0.538463	0.00663704
ATP6V1B2	salmon	0.538257	0.00666195
C1QR1	salmon	0.538004	0.00669256
THBD	salmon	0.537635	0.00673745
C22orf19	salmon	0.536739	0.00684756
RPS6KA1	salmon	0.53641	0.00688846
MYO1F	salmon	0.5364	0.0068896
CRK	salmon	0.536358	0.00689488
FRAG1	salmon	0.536111	0.0069257
SEC6L1	salmon	0.535707	0.00697635
RAB7	salmon	0.535559	0.00699485
CBARA1	salmon	0.535406	0.00701418
PFTK1	salmon	0.535027	0.0070622
ARSA	salmon	0.533772	0.00722297
OXSR1	salmon	0.533219	0.00729488
C10orf77	salmon	0.532966	0.00732787
C5AR1	salmon	0.532825	0.00734634
ZNF516	salmon	0.532617	0.00737372
FLJ42957	salmon	0.53221	0.00742741
FGD4	salmon	0.53176	0.00748722
SNX10	salmon	0.531475	0.00752535
C3orf40	salmon	0.531328	0.00754506
HMGCR	salmon	0.530897	0.00760298
ACTR2	salmon	0.530412	0.00766875
KIAA0232	salmon	0.53028	0.00768663
MAPRE3	salmon	0.529943	0.00773268
BCKDK	salmon	0.529772	0.00775617
CASP4	salmon	0.52964	0.00777428
OPLAH	salmon	0.529103	0.00784847
ATF6	salmon	0.529044	0.00785669
FUT7	salmon	0.528904	0.00787602
ZDHHC12	salmon	0.528333	0.00795582
HEY1	salmon	0.528142	0.00798264
GRAMD1A	salmon	0.527888	0.0080184
ARL11	salmon	0.527827	0.00802704
TRIM8	salmon	0.527591	0.00806034
F12	salmon	0.527337	0.00809649
ARHGAP26	salmon	0.52638	0.00823349
VPS4B	salmon	0.525712	0.00833035
SLC45A4	salmon	0.525692	0.00833337
ZYX	salmon	0.525471	0.00836549
COL18A1	salmon	0.525216	0.00840294
ZCCHC6	salmon	0.525155	0.00841179
DHX34	salmon	0.525152	0.00841229
NOLA3	salmon	0.524878	0.00845261
B3GALT7	salmon	0.524263	0.00854375
ZBTB34	salmon	0.524258	0.00854447
PIK3CD	salmon	0.522554	0.00880112
ZNF467	salmon	0.522359	0.00883093
LCP1	salmon	0.5222	0.00885518
NOTCH1	salmon	0.521872	0.00890565
PLEKHQ1	salmon	0.521342	0.00898747
TRIB1	salmon	0.521339	0.00898803
ZYG11B	salmon	0.520912	0.00905447
IL18RAP	salmon	0.520337	0.00914459
SLC39A1	salmon	0.520318	0.00914751
CSNK1D	salmon	0.520135	0.00917644
PFKFB4	salmon	0.520105	0.00918109
AGTRAP	salmon	0.519986	0.00919998
C20orf121	salmon	0.51992	0.00921037
VPS37C	salmon	0.519895	0.00921436
C16orf48	salmon	0.519816	0.00922682
MAEA	salmon	0.519599	0.00926126
PPFIA1	salmon	0.519171	0.00932959
KIAA1267	salmon	0.519106	0.00934001
TMCC3	salmon	0.518827	0.00938476
ALPL	salmon	0.518278	0.00947337
CALCOCO2	salmon	0.517947	0.00952716
CDC42EP3	salmon	0.517799	0.00955137
TNNI2	salmon	0.517643	0.00957686
KIAA1600	salmon	0.51748	0.00960354
ARPC1A	salmon	0.517421	0.00961318
OTX1	salmon	0.517416	0.00961391
CLDN9	salmon	0.516892	0.0097002
HCLS1	salmon	0.516569	0.00975377
CEACAM3	salmon	0.516552	0.00975662
ZHX2	salmon	0.515729	0.00989411
ANPEP	salmon	0.514937	0.0100278
RPRC1	salmon	0.514778	0.0100549
HTATIP2	salmon	0.514277	0.0101404
SNX16	salmon	0.514019	0.0101848
ZCSL2	salmon	0.512909	0.0103773
FBXO33	salmon	0.512762	0.010403
BZRP	salmon	0.51273	0.0104086
ATP6V1D	salmon	0.512509	0.0104474
TOLLIP	salmon	0.512479	0.0104527
NUAK2	salmon	0.511921	0.0105511
COL4A3BP	salmon	0.511811	0.0105706
IFNAR2	salmon	0.511249	0.0106707
HRB	salmon	0.510616	0.0107845
KLF6	salmon	0.510504	0.0108047
KIAA0040	salmon	0.510413	0.0108212
C14orf138	salmon	0.509612	0.0109669
SLC16A5	salmon	0.509208	0.011041
LOC651309	salmon	0.509158	0.0110503
TLK2	salmon	0.509119	0.0110573
SOD2	salmon	0.508048	0.011256
NUFIP2	salmon	0.507548	0.0113498
GALNT4	salmon	0.507217	0.0114122
PPM1F	salmon	0.507174	0.0114203
LTB4R	salmon	0.506778	0.0114955
LASP1	salmon	0.506655	0.0115189
PEX11G	salmon	0.506096	0.0116258
LOC649154	salmon	0.505777	0.0116872
ADCY4	salmon	0.505332	0.0117732
STRN4	salmon	0.50506	0.011826
FKBP1A	salmon	0.504913	0.0118547
TPARL	salmon	0.504875	0.0118622
SNX11	salmon	0.504739	0.0118887
AMICA1	salmon	0.504478	0.0119399
DAAM2	salmon	0.503971	0.0120397
PACSIN2	salmon	0.503792	0.0120751
UBR2	salmon	0.50362	0.0121091
CKLF	salmon	0.503259	0.012181
C19orf35	salmon	0.503135	0.0122057
FLJ39639	salmon	0.5028	0.0122729
PLP2	salmon	0.502665	0.0123
MIDN	salmon	0.502482	0.0123368
FMNL1	salmon	0.502117	0.0124104
PRKDC	salmon	0.501614	0.0125127
ROD1	salmon	0.501483	0.0125395
UBLCP1	salmon	0.501388	0.012559
ACTN4	salmon	0.501386	0.0125593
BIN3	salmon	0.501305	0.0125759
CD14	salmon	0.500013	0.0128427
HOMER3	salmon	0.499864	0.0128737
TA-PP2C	salmon	0.499853	0.0128761
C20orf24	salmon	0.499412	0.0129684
ATP11B	salmon	0.499221	0.0130086
SERPINA1	salmon	0.498896	0.0130771
GLIPR1	salmon	0.498883	0.0130799
GPSM3	salmon	0.49847	0.0131675
TMEM71	salmon	0.497622	0.0133489
CHMP1B	salmon	0.496913	0.0135021
FLJ25084	salmon	0.496657	0.0135577
FLOT1	salmon	0.495915	0.01372
VNN3	salmon	0.495898	0.0137238
TLR6	salmon	0.4958	0.0137455
LOC441124	salmon	0.495121	0.0138956
MPZ	salmon	0.494777	0.0139722
MOSPD2	salmon	0.494696	0.0139905
DHRSX	salmon	0.49373	0.0142076
VAV3	salmon	0.493665	0.0142223
SAMSN1	salmon	0.493003	0.0143729
RFX2	salmon	0.492765	0.0144275
MPZL1	salmon	0.492672	0.0144487
AXUD1	salmon	0.492133	0.0145729
TYK2	salmon	0.492059	0.0145899
TPD52L2	salmon	0.49188	0.0146315
C17orf55	salmon	0.491632	0.0146891
MANBA	salmon	0.491405	0.0147419
EFHC2	salmon	0.491139	0.0148041
GATS	salmon	0.490179	0.0150303
ELF2	salmon	0.489746	0.0151332
KIAA1961	salmon	0.489717	0.01514
RFX1	salmon	0.48963	0.0151608
CD177	salmon	0.489226	0.0152575
ATP6V0A1	salmon	0.489135	0.0152794
S100A6	salmon	0.489026	0.0153056
EDG4	salmon	0.489025	0.0153057
KBTBD2	salmon	0.488942	0.0153258
LRRC25	salmon	0.488778	0.0153654
NEDD9	salmon	0.488373	0.0154633
IFITM2	salmon	0.488111	0.015527
TTLL4	salmon	0.487403	0.0157
JARID2	salmon	0.487287	0.0157286
TNFSF14	salmon	0.487249	0.015738
C16orf28	salmon	0.485948	0.0160608
BAZ2B	salmon	0.485335	0.0162148
FES	salmon	0.485305	0.0162222
SNX27	salmon	0.485021	0.016294
RXRA	salmon	0.485004	0.0162985
RAC2	salmon	0.484875	0.0163311
LOC643423	salmon	0.484577	0.0164069
RNASEL	salmon	0.484567	0.0164094
SPFH1	salmon	0.484518	0.0164219
MAPK14	salmon	0.484435	0.0164431
DBNL	salmon	0.484405	0.0164508
COQ2	salmon	0.484176	0.0165092
SOS2	salmon	0.484033	0.0165458
MYO9B	salmon	0.483377	0.0167146
SIPA1L1	salmon	0.483353	0.0167209
TOR1A	salmon	0.483209	0.0167581
FLJ31413	salmon	0.482518	0.0169379
ACP6	salmon	0.482443	0.0169577
C10orf26	salmon	0.482172	0.0170286
LOC653157	salmon	0.482036	0.0170644
DIP13B	salmon	0.480737	0.0174087
TMEM127	salmon	0.480522	0.0174661
RAB36	salmon	0.480197	0.0175535
TNFRSF1A	salmon	0.480054	0.0175919
STX6	salmon	0.480045	0.0175945
C16orf7	salmon	0.479326	0.0177891
MAP3K11	salmon	0.479059	0.0178617
DPEP2	salmon	0.478672	0.0179676
SAP30BP	salmon	0.478184	0.0181017
PPP4C	salmon	0.478027	0.0181453
RNF38	salmon	0.477646	0.0182506
PHACTR1	salmon	0.477643	0.0182515
PAK1	salmon	0.475471	0.0188628
THEDC1	salmon	0.475406	0.0188813
FLJ38964	salmon	0.475405	0.0188817
FLJ20186	salmon	0.474201	0.019228
PPP2R5A	salmon	0.474163	0.0192389
LOC642678	salmon	0.47405	0.0192719
FLII	salmon	0.473986	0.0192903
SPP1	salmon	0.473945	0.0193022
ARHGAP15	salmon	0.473899	0.0193158
RAB43	salmon	0.473761	0.0193559
PCOLN3	salmon	0.473359	0.0194733
CAMK2G	salmon	0.47318	0.0195257
HIST2H2AC	salmon	0.472842	0.019625
HSPA6	salmon	0.472451	0.0197404
PPP1R10	salmon	0.472348	0.019771
MYST1	salmon	0.472013	0.0198704
RAD21	salmon	0.471785	0.0199385
PPP1CB	salmon	0.47135	0.0200684
TNPO3	salmon	0.471107	0.0201416
SPATA13	salmon	0.470777	0.020241
C1orf91	salmon	0.470776	0.0202412
VNN2	salmon	0.470155	0.0204295
KIAA0404	salmon	0.469923	0.0205002
ZFAND2B	salmon	0.469915	0.0205027
KIAA0367	salmon	0.469029	0.0207744
LRRC42	salmon	0.468657	0.0208898
TFEB	salmon	0.468369	0.020979
KIAA1324	salmon	0.467948	0.0211101
C9orf19	salmon	0.467779	0.021163
ZXDC	salmon	0.467468	0.0212608
ING2	salmon	0.467187	0.0213491
FKSG44	salmon	0.4652	0.0219833
NCOA6	salmon	0.464439	0.0222302
ARSG	salmon	0.464265	0.022287
LOC642373	salmon	0.46388	0.0224129
PCBP1	salmon	0.46345	0.0225544
DSC2	salmon	0.462901	0.0227358
ERO1L	salmon	0.46282	0.0227629
HIATL1	salmon	0.462153	0.0229852
PLEKHG3	salmon	0.462015	0.0230315
FBXL13	salmon	0.461757	0.0231182
CDKN2D	salmon	0.461488	0.0232088
SLC35E3	salmon	0.461474	0.0232133
F2RL1	salmon	0.461361	0.0232516
SEMA4D	salmon	0.46136	0.023252
H2AFZ	salmon	0.460079	0.0236881
TPCN2	salmon	0.459441	0.0239077
FSCN1	salmon	0.458732	0.0241535
TMEM43	salmon	0.458496	0.024236
CIC	salmon	0.456742	0.024855
CRIPT	salmon	0.456715	0.0248645
LOC349236	salmon	0.456567	0.0249176
C14orf94	salmon	0.45596	0.025135
OKL38	salmon	0.455368	0.0253488
DPEP3	salmon	0.455082	0.0254527
BAT2	salmon	0.454925	0.0255097
IL4R	salmon	0.454568	0.02564
MKL1	salmon	0.454274	0.0257477
UNQ1912	salmon	0.454159	0.0257898
C10orf119	salmon	0.453697	0.0259601
CSF3R	salmon	0.453305	0.026105
LOC651612	salmon	0.452865	0.0262686
THRAP6	salmon	0.451693	0.0267083
LOC650967	salmon	0.450894	0.0270117
LRMP	salmon	0.450139	0.0273005
MVP	salmon	0.449836	0.0274172
FAM100B	salmon	0.449836	0.0274173
LOC641997	salmon	0.44944	0.0275704
MRVI1	salmon	0.44853	0.0279248
TMEM59	salmon	0.44839	0.0279797
PPP6C	salmon	0.448148	0.0280749
ZNF11B	salmon	0.447785	0.0282176
PSD4	salmon	0.445869	0.0289824
XPC	salmon	0.445642	0.0290737
KIAA0674	salmon	0.444692	0.0294602
KCNJ2	salmon	0.444312	0.0296156
ITGA5	salmon	0.444294	0.0296229
DNAL4	salmon	0.44382	0.029818
C20orf31	salmon	0.441797	0.0306621
PPP1R15A	salmon	0.440907	0.0310393
SAMD4B	salmon	0.439278	0.0317396
SYTL3	salmon	0.439192	0.0317771
PHF20	salmon	0.438582	0.0320426
C17orf60	salmon	0.438471	0.0320912
CECR6	salmon	0.438284	0.032173
STX10	salmon	0.437808	0.0323824
PHLPP	salmon	0.437775	0.0323965
GPR30	salmon	0.436524	0.0329517
C1orf176	salmon	0.435817	0.0332691
ATP6V0D1	salmon	0.435792	0.03328
FLJ10404	salmon	0.435314	0.0334962
LOC153222	salmon	0.435078	0.0336028
CD59	salmon	0.434925	0.0336725
BIN2	salmon	0.433358	0.0343906
ARID3B	salmon	0.432327	0.0348698
CHRNA10	salmon	0.431328	0.0353391
DAZAP2	salmon	0.428548	0.0366717
SLC25A14	salmon	0.42852	0.0366852
RIN3	salmon	0.428356	0.0367653
TRIM11	salmon	0.428119	0.036881
KIAA0556	salmon	0.427987	0.0369456
MLL4	salmon	0.427945	0.0369659
Magmas	salmon	0.426707	0.0375759
PHKA2	salmon	0.426133	0.0378613
LOC653610	salmon	0.426035	0.0379102
GADD45B	salmon	0.42549	0.038183
SMAD4	salmon	0.425487	0.0381846
SEPHS2	salmon	0.424083	0.0388951
LOC642489	salmon	0.423137	0.0393791
EPS15L1	salmon	0.422849	0.0395276
CORO1A	salmon	0.422379	0.0397706
CTSD	salmon	0.422143	0.0398933
SERPINB8	salmon	0.421808	0.0400678
PYCARD	salmon	0.421466	0.0402465
AKAP13	salmon	0.419979	0.041031
TBKBP1	salmon	0.41991	0.0410673
LOC283219	salmon	0.41915	0.0414733
SSH1	salmon	0.418468	0.0418399
NPEPL1	salmon	0.418196	0.0419868
COL9A2	salmon	0.417854	0.0421725
OSTM1	salmon	0.417173	0.0425437
SH2D3C	salmon	0.416646	0.0428325
CBX7	salmon	0.416385	0.0429761
LIMK2	salmon	0.415943	0.0432204
MOBKL2A	salmon	0.41587	0.0432608
EDD1	salmon	0.414949	0.0437734
C14orf131	salmon	0.413286	0.044711
FGD3	salmon	0.412616	0.0450934
STARD10	salmon	0.412606	0.045099
TOP3A	salmon	0.412464	0.0451801
NCOA4	salmon	0.412449	0.0451891
C15orf39	salmon	0.411984	0.0454561
CENTD3	salmon	0.410385	0.0463842
RNF166	salmon	0.409815	0.0467188
GSK3B	salmon	0.409759	0.0467518
LOC648998	salmon	0.409138	0.0471185
OSM	salmon	0.408248	0.0476484
FLJ45244	salmon	0.407895	0.0478597
CASP5	salmon	0.407739	0.0479534
NFKBIZ	salmon	0.407389	0.0481639
MGC45871	salmon	0.407226	0.0482619
LOC283547	salmon	0.405339	0.0494117
PSMB3	salmon	0.405133	0.0495384
IMPDH1	salmon	0.404287	0.0500619
DEDD2	salmon	0.404161	0.0501397
FLJ39575	salmon	0.404117	0.0501673
INPP5D	salmon	0.40324	0.0507153
CCDC49	salmon	0.40315	0.050772
F25965	salmon	0.403048	0.0508359
FAM8A1	salmon	0.400884	0.05221
FLJ13639	salmon	0.400864	0.0522232
SOLH	salmon	0.400505	0.0524539
BCAT1	salmon	0.399455	0.0531335
MPPE1	salmon	0.398765	0.0535838
PBXIP1	salmon	0.398446	0.0537927
RNASET2	salmon	0.39763	0.0543313
PECR	salmon	0.396975	0.0547658
MRPL28	salmon	0.39671	0.0549425
RSHL2	salmon	0.396632	0.0549949
FLJ25778	salmon	0.395415	0.0558128
FLJ37970	salmon	0.394984	0.0561042
KCND1	salmon	0.394739	0.0562706
NUDT18	salmon	0.394472	0.0564526
ARMC7	salmon	0.393594	0.057054
ABCA1	salmon	0.390639	0.059113
RGS18	salmon	0.390239	0.0593965
BAT5	salmon	0.388481	0.060653
DDAH2	salmon	0.387966	0.0610246
HKR3	salmon	0.38729	0.061516
FCHO1	salmon	0.386554	0.0620538
ENTPD4	salmon	0.386165	0.0623395
LOC441155	salmon	0.38551	0.0628231
SMG5	salmon	0.384813	0.0633411
ARHGAP27	salmon	0.384204	0.0637959
RTDR1	salmon	0.382876	0.0647966
MID1IP1	salmon	0.382358	0.0651903
MAPK13	salmon	0.381152	0.0661143
CD97	salmon	0.380229	0.0668277
GNG10	salmon	0.379838	0.0671314
FCN1	salmon	0.37972	0.0672239
RIPK3	salmon	0.379334	0.0675254
CIDEB	salmon	0.377737	0.0687834
XKR3	salmon	0.377631	0.0688681
TIPARP	salmon	0.376446	0.0698144
LOC653158	salmon	0.374592	0.0713147
WDFY2	salmon	0.374441	0.0714375
LOC652878	salmon	0.37442	0.071455
SLC25A34	salmon	0.37367	0.0720696
TAF12	salmon	0.372217	0.073272
DGKG	salmon	0.372045	0.0734153
KIAA0999	salmon	0.371156	0.0741595
SLC9A1	salmon	0.369273	0.0757551
ZNFX1	salmon	0.366554	0.0781051
UBE2W	salmon	0.36569	0.0788633
ACN9	salmon	0.364886	0.0795734
SLC26A8	salmon	0.36297	0.0812853
MGC52000	salmon	0.362794	0.0814443
MYST3	salmon	0.36265	0.0815746
TXNIP	salmon	0.362588	0.0816304
TCFL5	salmon	0.362089	0.082082
CUGBP2	salmon	0.361706	0.0824301
LATS2	salmon	0.360827	0.0832339
RNF167	salmon	0.360797	0.0832615
TNFAIP8L2	salmon	0.360133	0.0838721
KIAA0319	salmon	0.359208	0.0847289
KATNB1	salmon	0.357137	0.0866697
TBC1D2	salmon	0.357084	0.0867204
TREML3	salmon	0.356498	0.0872759
CBX4	salmon	0.356294	0.0874701
RBAF600	salmon	0.356153	0.087604
RPS6KA5	salmon	0.354871	0.0888326
XRN2	salmon	0.354663	0.0890328
ADM	salmon	0.35287	0.0907753
RAD23B	salmon	0.351388	0.0922343
LOC129285	salmon	0.350319	0.093298
UPB1	salmon	0.349232	0.094388
TGFBR2	salmon	0.347679	0.0959633
TMEM70	salmon	0.346586	0.0970831
ZNF319	salmon	0.346361	0.0973151
BANP	salmon	0.344601	0.0991419
TMEM45B	salmon	0.344499	0.099249
GATAD2A	salmon	0.344023	0.0997477
PDE3B	salmon	0.341219	0.102724
CENTB1	salmon	0.340854	0.103116
ZBTB16	salmon	0.338452	0.105725
FLJ14107	salmon	0.33832	0.10587
EPS15	salmon	0.338188	0.106014
PELO	salmon	0.337795	0.106447
NIP30	salmon	0.337598	0.106664
DPF2	salmon	0.33754	0.106728
C14orf159	salmon	0.337314	0.106978
MTIF3	salmon	0.336526	0.107851
LRCH4	salmon	0.336212	0.108201
MICAL1	salmon	0.335848	0.108607
KIAA0922	salmon	0.33366	0.111074
PRKCD	salmon	0.332823	0.112029
HSPA1B	salmon	0.332742	0.112122
DKFZp434K1815	salmon	0.331638	0.113391
TST	salmon	0.330195	0.115064
FLJ10916	salmon	0.32988	0.115432
PRMT5	salmon	0.327348	0.11842
TAF4	salmon	0.32403	0.12242
AKAP8L	salmon	0.323518	0.123047
ZNF161	salmon	0.320943	0.12623
CSGlcA-T	salmon	0.318237	0.129639
CCND3	salmon	0.317331	0.130795
SMARCD2	salmon	0.31412	0.134953
FLJ12571	salmon	0.310495	0.139759
LOC645649	salmon	0.307548	0.143756
CTDSP2	salmon	0.307232	0.14419
NINJ1	salmon	0.304349	0.148187
RBM33	salmon	0.302302	0.151071
C1orf60	salmon	0.301143	0.152722
ARRDC1	salmon	0.300934	0.153021
CPEB3	salmon	0.298364	0.156733
RASA2	salmon	0.293453	0.164001
SF1	salmon	0.290938	0.167813
ACPL2	salmon	0.289297	0.170333
LOC648605	salmon	0.288168	0.172084
PITPNA	salmon	0.287654	0.172884
PTK9L	salmon	0.286584	0.174558
LOC255783	salmon	0.286165	0.175218
SIPA1	salmon	0.284525	0.177812
TNFRSF1B	salmon	0.282561	0.180956
OTUD5	salmon	0.282046	0.181787
NFKBIA	salmon	0.280765	0.183864
PNKP	salmon	0.279941	0.185208
S100A4	salmon	0.277951	0.188484
SIRT7	salmon	0.276971	0.190112
IMPA2	salmon	0.276233	0.191343
PRKD2	salmon	0.275655	0.192313
LOC285908	salmon	0.271853	0.198767
PSCD4	salmon	0.27111	0.200046
DUSP1	salmon	0.26582	0.20931
TREML4	salmon	0.265191	0.21043
RNF44	salmon	0.264897	0.210957
U16	salmon	0.26282	0.214691
THBS3	salmon	0.260935	0.218119
UBL3	salmon	0.26085	0.218274
FBXO38	salmon	0.260253	0.219367
LOC389541	salmon	0.256202	0.226884
FLJ12078	salmon	0.254812	0.229503
ATG12	salmon	0.252684	0.23355
KIAA1706	salmon	0.252024	0.234815
ZFP36	salmon	0.246837	0.244911
PARP4	salmon	0.243162	0.252234
HLA-E	salmon	0.239697	0.259266
MYH9	salmon	0.235803	0.267318
LPP	salmon	0.230431	0.278686
SCAP	salmon	0.213344	0.316847
ZNF384	salmon	0.202264	0.343213
CD300LB	salmon	0.194632	0.362108
PRDM8	salmon	0.185182	0.386325
CABLES2	salmon	0.181892	0.394967
EFEMP2	salmon	0.181726	0.395406
FLJ35119	salmon	0.179536	0.401222
ZDHHC19	salmon	0.176659	0.408934
FLJ25222	salmon	0.174458	0.414888
ZNF137	salmon	0.162107	0.449176
RBM5	salmon	0.142654	0.506072
LOC641825	salmon	0.135369	0.52825
RAB20	salmon	0.124826	0.561136
FGFR1OP	salmon	0.0356143	0.868778
DNAJB2	salmon	-0.160842	0.452769
HSD17B4	salmon	-0.214536	0.314085
ZNF23	salmon	-0.217652	0.30694
EIF3S9	salmon	-0.217874	0.306433
PDSS2	salmon	-0.226913	0.286295
LOC653890	salmon	-0.232181	0.274949
PIK3R2	salmon	-0.263611	0.213264
LNK	salmon	-0.264452	0.211752
TCEB2	salmon	-0.26789	0.205652
ANP32B	salmon	-0.270721	0.200717
CHCHD3	salmon	-0.281138	0.183258
MRPL16	salmon	-0.289255	0.170398
CD4	salmon	-0.29334	0.164171
REXO2	salmon	-0.302653	0.150574
EXOSC9	salmon	-0.316307	0.132111
C1QA	salmon	-0.317423	0.130678
ASAHL	salmon	-0.319229	0.128382
C18orf8	salmon	-0.323443	0.123139
TLR7	salmon	-0.324244	0.122159
MAP4K5	salmon	-0.325207	0.120991
IFRD2	salmon	-0.332457	0.112448
SUGT1	salmon	-0.348762	0.0948626
B4GALT3	salmon	-0.352265	0.0913688
YBX1	salmon	-0.354519	0.089172
IMMP1L	salmon	-0.356005	0.0877449
PRR5	salmon	-0.356042	0.0877103
CA5B	salmon	-0.359449	0.0845044
HLA-DRB4	salmon	-0.363481	0.0808266
TIMM23	salmon	-0.366011	0.0785809
MAL	salmon	-0.367399	0.0773685
MGST3	salmon	-0.368494	0.0764227
KIF21A	salmon	-0.370866	0.0744039
UFC1	salmon	-0.372017	0.0734393
LOC653971	salmon	-0.376458	0.0698047
HEG1	salmon	-0.376894	0.069455
ODC1	salmon	-0.37923	0.0676069
BTF3	salmon	-0.384136	0.0638467
GOLGA3	salmon	-0.386865	0.061826
APOBEC3C	salmon	-0.390592	0.0591465
TMEM106C	salmon	-0.395203	0.0559558
MS4A7	salmon	-0.398558	0.0537198
TARS	salmon	-0.398967	0.0534517
CCT8	salmon	-0.400631	0.0523728
THOC1	salmon	-0.402792	0.050997
RABGGTB	salmon	-0.403704	0.0504249
PYCR2	salmon	-0.410974	0.046041
LIPA	salmon	-0.411397	0.0457953
EIF5A	salmon	-0.415342	0.043554
FCER1A	salmon	-0.425249	0.0383041
NACA	salmon	-0.430935	0.0355253
MBTPS1	salmon	-0.4366	0.0329178
ETFA	salmon	-0.437875	0.0323526
ATF5	salmon	-0.438668	0.0320048
UROD	salmon	-0.440647	0.0311502
RGC32	salmon	-0.441921	0.0306098
NUDT1	salmon	-0.443873	0.0297962
DNCL1	salmon	-0.444626	0.0294869
MRPL18	salmon	-0.445526	0.0291207
AK1	salmon	-0.447107	0.0284864
HNRPA3	salmon	-0.459044	0.0240451
LTB	salmon	-0.460368	0.023589
NPC1	salmon	-0.461858	0.0230841
PSMC2	salmon	-0.462495	0.022871
AP2S1	salmon	-0.462501	0.0228689
NGRN	salmon	-0.463205	0.0226353
MCM3	salmon	-0.464684	0.0221504
GNGT2	salmon	-0.470894	0.0202056
PEA15	salmon	-0.471645	0.0199802
LGALS2	salmon	-0.472931	0.0195987
POLR3C	salmon	-0.473368	0.0194707
LOC400948	salmon	-0.475191	0.018943
NDUFA6	salmon	-0.475942	0.0187289
TXK	salmon	-0.476075	0.0186912
C16orf61	salmon	-0.476216	0.0186514
PRKX	salmon	-0.476511	0.0185682
NOP5/NOP58	salmon	-0.478062	0.0181356
CD99	salmon	-0.480215	0.0175486
PTGDS	salmon	-0.48156	0.0171898
LOC650276	salmon	-0.482608	0.0169145
TOMM7	salmon	-0.483462	0.0166927
SLC25A23	salmon	-0.483473	0.01669
HLA-DQA1	salmon	-0.48367	0.0166391
GPI	salmon	-0.483818	0.016601
SRP46	salmon	-0.484743	0.0163647
LOC440055	salmon	-0.487447	0.0156893
LGALS3BP	salmon	-0.488477	0.0154381
MMD	salmon	-0.491979	0.0146086
VASH1	salmon	-0.492975	0.0143793
RPL12	salmon	-0.493723	0.0142093
GZMK	salmon	-0.493993	0.0141483
PRPSAP2	salmon	-0.495039	0.0139139
RSAD1	salmon	-0.502771	0.0122786
FAM82C	salmon	-0.505649	0.0117119
STAMBPL1	salmon	-0.50771	0.0113195
LOC642083	salmon	-0.50876	0.0111237
LDOC1L	salmon	-0.510872	0.0107383
ALKBH5	salmon	-0.512386	0.0104691
RAG1AP1	salmon	-0.5127	0.0104139
CUL4A	salmon	-0.513077	0.0103479
ATP5H	salmon	-0.513081	0.0103472
GARS	salmon	-0.517582	0.00958677
METTL3	salmon	-0.518299	0.00947003
RABL3	salmon	-0.51923	0.00932022
CD160	salmon	-0.5198	0.00922947
LOC650954	salmon	-0.521432	0.00897359
NPDC1	salmon	-0.522402	0.00882423
RNF5P1	salmon	-0.523709	0.00862647
CAPNS1	salmon	-0.52434	0.00853225
HSPC023	salmon	-0.527003	0.0081441
PIGY	salmon	-0.527177	0.00811919
IRF3	salmon	-0.527713	0.00804309
GPX4	salmon	-0.528745	0.00789825
KPNA6	salmon	-0.530438	0.00766513
TSPYL1	salmon	-0.530669	0.00763391
DOK2	salmon	-0.532431	0.0073982
LOC646630	salmon	-0.538493	0.00663339
RCN1	salmon	-0.54076	0.00636495
C6orf49	salmon	-0.541055	0.00633063
CYB5A	salmon	-0.541469	0.00628285
CD48	salmon	-0.542101	0.00621043
LOC203547	salmon	-0.544846	0.00590388
SLC25A6	salmon	-0.547461	0.00562377
SSB	salmon	-0.547928	0.00557496
GEMIN6	salmon	-0.550479	0.00531443
RPS27A	salmon	-0.55112	0.00525061
AKR7A2	salmon	-0.551271	0.00523565
RPL15	salmon	-0.552865	0.00508013
DGCR6	salmon	-0.553796	0.00499101
NMT1	salmon	-0.556181	0.0047689
LOC645161	salmon	-0.557064	0.00468879
EEF1B2	salmon	-0.558231	0.00458463
PSMB10	salmon	-0.558296	0.00457888
PSMA5	salmon	-0.55917	0.00450221
GRPEL2	salmon	-0.562423	0.00422635
LOC388275	salmon	-0.563377	0.0041482
FER1L3	salmon	-0.565896	0.00394774
NDUFS7	salmon	-0.568968	0.0037143
SFRS2	salmon	-0.573026	0.00342394
HNRPR	salmon	-0.573599	0.00338452
RPL13	salmon	-0.57699	0.00315904
MRPL17	salmon	-0.577473	0.00312803
CCND2	salmon	-0.578326	0.0030738
RPL26	salmon	-0.579473	0.00300213
NELF	salmon	-0.581455	0.00288165
SLC27A3	salmon	-0.581969	0.0028511
BUB3	salmon	-0.582247	0.00283469
DENND2D	salmon	-0.582761	0.00280457
LOC389674	salmon	-0.583552	0.0027587
RFX5	salmon	-0.584025	0.00273157
PTGDR	salmon	-0.585851	0.00262902
ACAT2	salmon	-0.586302	0.00260421
C20orf30	salmon	-0.588391	0.00249182
GSTO1	salmon	-0.589028	0.00245834
PLCG1	salmon	-0.590251	0.0023952
HSP90AB1	salmon	-0.591747	0.00231985
TMEM126A	salmon	-0.592077	0.00230353
UBA52	salmon	-0.593405	0.00223871
RPL24	salmon	-0.595566	0.00213657
CX3CR1	salmon	-0.595723	0.00212934
SH2D1A	salmon	-0.595955	0.00211861
ACP1	salmon	-0.596496	0.00209386
TARP	salmon	-0.596679	0.00208553
PLEKHO1	salmon	-0.597163	0.0020637
PCGF4	salmon	-0.597949	0.00202857
SEPW1	salmon	-0.598043	0.00202441
LFNG	salmon	-0.59949	0.00196126
KARS	salmon	-0.600599	0.001914
FAM62A	salmon	-0.600682	0.00191048
RCN2	salmon	-0.602682	0.0018278
LOC129531	salmon	-0.602987	0.0018155
ERH	salmon	-0.604235	0.00176574
ZNF664	salmon	-0.613636	0.00142711
LOC649049	salmon	-0.615939	0.00135319
EIF3S12	salmon	-0.620645	0.00121229
MTSS1	salmon	-0.621208	0.00119632
TGIF2	salmon	-0.623242	0.00114009
LANCL1	salmon	-0.627374	0.00103279
RAP2A	salmon	-0.627492	0.00102985
SNURF	salmon	-0.627736	0.00102382
PLAC8	salmon	-0.627968	0.0010181
COX6C	salmon	-0.629086	0.000990935
ST3GAL5	salmon	-0.629824	0.000973362
SET	salmon	-0.630374	0.000960426
HNRPDL	salmon	-0.630627	0.00095452
GCDH	salmon	-0.631374	0.000937295
ABI3	salmon	-0.6325	0.000911836
CYB5-M	salmon	-0.637415	0.00080749
PYHIN1	salmon	-0.639234	0.00077159
RPS17	salmon	-0.639911	0.000758572
SOD1	salmon	-0.641638	0.000726245
SCAP1	salmon	-0.642469	0.000711108
LOC441876	salmon	-0.64373	0.00068867
HNRPH1	salmon	-0.644355	0.000677768
RHOC	salmon	-0.64543	0.000659377
PSME2	salmon	-0.646204	0.00064641
SNRPD2	salmon	-0.647362	0.000627399
TMSB10	salmon	-0.647627	0.000623129
LOC285900	salmon	-0.648084	0.000615802
C21orf7	salmon	-0.652692	0.000546051
DDX47	salmon	-0.658711	0.000465283
ABLIM1	salmon	-0.660175	0.000447287
LOC387882	salmon	-0.664598	0.000396513
CUL1	salmon	-0.665791	0.0003837
LOC440737	salmon	-0.666942	0.000371686
TRAT1	salmon	-0.672174	0.000321098
LOC347544	salmon	-0.680169	0.000255331
HAX1	salmon	-0.681328	0.000246845
CD47	salmon	-0.685031	0.000221358
LOC440733	salmon	-0.687474	0.000205826
LOC127295	salmon	-0.689739	0.000192286
RAFTLIN	salmon	-0.690799	0.00018622
LOC644511	salmon	-0.691529	0.000182137
FLT3LG	salmon	-0.70233	0.000130248
LOC652624	salmon	-0.720815	7.08602e-05
