# Supplementary material for: Identifying patterns of immune related cells and genes in the peripheral blood of acute myocardial infarction patients using a small cohort
Source: J Transl Med. 2022 Jul 21;20:321. doi: 10.1186/s12967-022-03517-1 (PMC9306178; doi:10.1186/s12967-022-03517-1)
Supplement: Supplementary file 9 — Additional file 9: Table S8. Detailed results of the GO enrichment analysis. [file 12967_2022_3517_MOESM9_ESM.xls]

## Sheet: Additional Table S8
GO functional enrichment	ID	Description	GeneRatio	BgRatio	pvalue	p.adjust	qvalue	geneID	Count
BP	GO:0042119	neutrophil activation	95/816	500/18862	2.59e-35	1.32e-31	1.09e-31	8993/55276/978/338339/79930/2548/10970/961/199675/51646/4318/126014/5594/11031/124583/10555/51316/8694/6556/8972/5005/3101/3684/51719/5724/101/25797/27180/5337/391/1992/10533/6850/11025/3326/57580/7097/9545/7305/5023/2268/116844/3482/5236/383/64386/83716/2357/353189/201294/8876/53831/1378/84106/53917/5686/57153/5004/5611/240/6515/410/728/10097/8807/1084/290/51382/54472/929/23200/5265/11010/158747…	95
BP	GO:0002446	neutrophil mediated immunity	94/816	499/18862	1.25e-34	3.2e-31	2.63e-31	8993/55276/978/338339/79930/2548/10970/961/199675/51646/4318/126014/5594/11031/124583/10555/51316/8694/6556/8972/5005/3101/3684/51719/5724/101/25797/27180/51135/5337/391/1992/10533/6850/11025/3326/7097/9545/7305/5023/2268/116844/3482/5236/383/64386/83716/2357/353189/201294/8876/53831/1378/84106/53917/5686/57153/5004/5611/240/6515/410/728/10097/1084/290/51382/54472/929/23200/5265/11010/158747/4126…	94
BP	GO:0043312	neutrophil degranulation	92/816	485/18862	3.82e-34	6.51e-31	5.34e-31	8993/55276/978/338339/79930/2548/10970/961/199675/51646/4318/126014/5594/11031/124583/10555/51316/8694/6556/8972/5005/3101/3684/51719/5724/101/25797/27180/5337/391/1992/10533/6850/11025/3326/7097/9545/7305/5023/2268/116844/3482/5236/383/64386/83716/2357/353189/201294/8876/53831/1378/84106/53917/5686/57153/5004/5611/240/6515/410/728/10097/1084/290/51382/54472/929/23200/5265/11010/158747/4126/57126…	92
BP	GO:0002283	neutrophil activation involved in immune response	92/816	488/18862	6.36e-34	8.12e-31	6.67e-31	8993/55276/978/338339/79930/2548/10970/961/199675/51646/4318/126014/5594/11031/124583/10555/51316/8694/6556/8972/5005/3101/3684/51719/5724/101/25797/27180/5337/391/1992/10533/6850/11025/3326/7097/9545/7305/5023/2268/116844/3482/5236/383/64386/83716/2357/353189/201294/8876/53831/1378/84106/53917/5686/57153/5004/5611/240/6515/410/728/10097/1084/290/51382/54472/929/23200/5265/11010/158747/4126/57126…	92
BP	GO:0045088	regulation of innate immune response	45/816	315/18862	1.61e-12	1.65e-09	1.35e-09	338339/11213/8454/5721/149628/3055/1147/51311/7099/101/26253/6850/4068/3460/3326/3459/7305/2268/383/3148/1378/5894/9021/2033/5686/5699/4067/1398/3661/8807/11126/56339/3455/5591/6041/7294/5058/10623/5701/29108/5691/2219/9252/5580/3133	45
BP	GO:0031349	positive regulation of defense response	47/816	361/18862	1.47e-11	1.26e-08	1.03e-08	338339/961/8454/5721/149628/3055/1147/51311/7099/101/5595/1050/26253/6850/4068/7097/7305/383/3148/5894/2033/5686/5699/4067/1051/3661/8807/11126/5591/63940/7132/7294/5058/10623/5701/2150/29108/5008/64332/5691/5603/2219/9252/5580/51284/4792/3133	47
BP	GO:0002831	regulation of response to biotic stimulus	50/816	420/18862	8.74e-11	6.38e-08	5.24e-08	338339/11213/8454/5721/149628/3055/1147/51311/10269/7099/101/5595/26253/6850/4068/3460/3326/3459/7305/2268/383/3148/1378/5894/9021/2033/5686/5699/4067/1398/3661/10221/8807/11126/56339/3455/5591/6041/7294/5058/10623/5701/2150/29108/5691/2219/9252/5580/81545/3133	50
BP	GO:0002886	regulation of myeloid leukocyte mediated immunity	16/816	52/18862	3.13e-10	2e-07	1.64e-07	3684/5724/6850/9846/7305/2268/383/201294/84106/4067/57126/2242/5880/2150/3566/3133	16
BP	GO:0002833	positive regulation of response to biotic stimulus	36/816	258/18862	5.43e-10	3.08e-07	2.53e-07	338339/8454/5721/149628/3055/1147/51311/7099/101/26253/6850/4068/7305/383/3148/5894/2033/5686/5699/4067/3661/8807/11126/5591/7294/5058/10623/5701/2150/29108/5691/2219/9252/5580/81545/3133	36
BP	GO:0045089	positive regulation of innate immune response	33/816	223/18862	6.16e-10	3.15e-07	2.58e-07	338339/8454/5721/149628/3055/1147/51311/7099/101/26253/6850/4068/7305/3148/5894/2033/5686/5699/4067/3661/8807/11126/5591/7294/5058/10623/5701/29108/5691/2219/9252/5580/3133	33
BP	GO:0001819	positive regulation of cytokine production	49/816	437/18862	1.07e-09	4.97e-07	4.08e-07	602/6647/149628/10555/6556/1147/5005/51311/7099/5724/101/6850/8809/7097/3459/7305/2268/6774/3148/2033/5004/7805/7100/1051/728/23633/3661/11126/5591/929/63940/10211/10333/1432/7294/10623/2150/4050/3566/29108/5008/5603/2219/57493/3304/51284/920/25865/3133	49
BP	GO:0042110	T cell activation	51/816	474/18862	2.04e-09	8.7e-07	7.14e-07	602/961/2629/7454/6647/64218/6556/79865/5573/101/54518/6850/3955/8809/57580/2319/6774/383/8876/1378/5699/4067/7805/1051/604/2529/5293/3936/11126/285282/56339/2280/5591/8740/5880/6655/5058/2150/3566/11151/29108/64332/11035/79626/7048/7704/896/920/7133/3133/4627	51
BP	GO:0002573	myeloid leukocyte differentiation	30/816	204/18862	4.31e-09	1.69e-06	1.39e-06	10456/2629/4318/126014/9770/3930/7099/1050/6688/11025/9846/7097/4055/7305/10100/4067/1051/29887/5293/10221/3059/8451/2242/1432/2150/28962/3635/7048/920/4627	30
BP	GO:0002703	regulation of leukocyte mediated immunity	30/816	209/18862	7.67e-09	2.8e-06	2.3e-06	7454/3684/7099/5724/6850/4068/8809/9846/7305/2268/383/201294/1378/84106/4067/604/1398/2529/8807/11126/57126/2242/5880/2150/3566/9984/11035/7133/81545/3133	30
BP	GO:0002429	immune response-activating cell surface receptor signaling pathway	50/816	481/18862	9.29e-09	2.83e-06	2.32e-06	338339/660/961/50852/8454/5594/5721/7454/3055/1147/5595/10094/26253/6850/4068/3326/5335/7305/2268/2357/1378/5894/84106/2033/5686/5699/4067/7805/1398/728/10097/5293/11126/10552/10451/1998/3117/7294/5058/5701/64332/5691/3635/2219/3126/9252/5580/920/25865/5296	50
BP	GO:0002757	immune response-activating signal transduction	50/816	481/18862	9.29e-09	2.83e-06	2.32e-06	338339/660/961/50852/8454/5594/5721/7454/3055/1147/5595/10094/26253/6850/4068/3326/5335/7305/2268/2357/1378/5894/84106/2033/5686/5699/4067/7805/1398/728/10097/5293/11126/10552/10451/1998/3117/7294/5058/5701/64332/5691/3635/2219/3126/9252/5580/920/25865/5296	50
BP	GO:0006909	phagocytosis	43/816	381/18862	9.41e-09	2.83e-06	2.32e-06	961/5728/1785/5868/5594/11031/7454/6647/3055/6556/3684/7099/5595/10094/8291/391/6850/3326/5335/7097/7305/1089/2268/201294/4067/311/4689/1398/10097/10552/929/10451/5880/5058/2150/51411/11151/29108/2219/5580/5296/4627/55647	43
BP	GO:0032418	lysosome localization	17/816	74/18862	1.25e-08	3.54e-06	2.9e-06	9842/23095/6850/9846/5729/81565/2268/201294/9043/4067/5293/2242/5880/5730/7942/3566/4627	17
BP	GO:0051056	regulation of small GTPase mediated signal transduction	38/816	319/18862	1.61e-08	4.34e-06	3.57e-06	83478/1785/389/9448/9922/8660/391/51291/57580/84986/5894/22898/397/4067/55288/5863/604/1398/121512/23092/4851/285282/10211/10451/5880/6655/4650/26037/55843/2150/23550/11214/89846/19/57493/5922/6494/5296	38
BP	GO:0043300	regulation of leukocyte degranulation	13/816	43/18862	1.85e-08	4.74e-06	3.89e-06	3684/5724/6850/9846/2268/201294/84106/4067/57126/2242/5880/2150/3566	13
BP	GO:0030099	myeloid cell differentiation	44/816	419/18862	5.43e-08	1.32e-05	1.08e-05	10456/2629/4318/126014/9770/3930/7099/1050/6688/11025/9846/7097/4055/7305/2539/6774/3148/2033/10100/4067/1051/604/29887/5293/10221/10296/3059/8451/5591/2242/1432/5613/23054/2150/1441/28962/3635/7048/7704/3304/920/4792/7538/4627	44
BP	GO:0002218	activation of innate immune response	23/816	148/18862	9.77e-08	2.27e-05	1.86e-05	338339/8454/5721/149628/3055/1147/7099/26253/6850/7305/5894/2033/5686/5699/4067/5591/5058/5701/29108/5691/2219/9252/5580	23
BP	GO:0034341	response to interferon-gamma	27/816	197/18862	1.14e-07	2.53e-05	2.07e-05	58191/961/7454/3055/6556/7099/5724/3460/3326/7097/3459/383/9021/10097/3661/81603/7791/10241/10581/3117/7294/339122/818/3126/5580/3133/55647	27
BP	GO:0007249	I-kappaB kinase/NF-kappaB signaling	33/816	282/18862	2.15e-07	4.59e-05	3.77e-05	602/389/124583/1147/51311/7099/51135/57708/9516/1524/8837/7311/7097/4055/57161/57153/6233/4215/3661/81603/2280/929/10333/7132/2150/29108/11214/9755/11035/51284/920/4792/6275	33
BP	GO:0010506	regulation of autophagy	36/816	328/18862	3.03e-07	6.19e-05	5.08e-05	10456/2629/5899/528/57533/10269/23604/5595/10533/533/8851/58476/523/58528/6774/8408/9517/2033/10645/526/22926/81603/826/10241/51382/11011/207063/535/7942/4864/219931/9528/9114/29108/2932/5296	36
BP	GO:0032930	positive regulation of superoxide anion generation	8/816	18/18862	3.53e-07	6.9e-05	5.66e-05	6647/3684/6850/7305/2771/57126/2150/5580	8
BP	GO:1903305	regulation of regulated secretory pathway	21/816	136/18862	3.91e-07	6.9e-05	5.66e-05	5868/134957/3684/5724/6850/9846/9545/5023/2771/2268/201294/84106/4067/4851/57126/2242/5880/2150/3566/2932/64780	21
BP	GO:0090382	phagosome maturation	12/816	46/18862	3.97e-07	6.9e-05	5.66e-05	528/11031/533/10981/523/526/51382/535/339122/9114/11151/55647	12
BP	GO:0070498	interleukin-1-mediated signaling pathway	18/816	103/18862	4.02e-07	6.9e-05	5.66e-05	11213/8454/5721/1147/5595/51135/7311/57161/5686/5699/7850/6233/4215/54472/5701/5691/9252/4792	18
BP	GO:0031098	stress-activated protein kinase signaling cascade	32/816	276/18862	4.05e-07	6.9e-05	5.66e-05	8454/5594/9770/9448/5911/1147/10269/7099/5595/51135/6688/6850/7311/4055/9043/4067/6233/4215/11342/10221/1432/28988/4296/5058/2150/4616/29108/10044/5603/11183/1843/7538	32
BP	GO:0046777	protein autophosphorylation	28/816	226/18862	5.59e-07	9.2e-05	7.56e-05	660/11213/9770/3055/8569/5911/23604/9625/5595/2268/2872/8408/4117/10645/4067/4215/9943/10553/2242/4296/5613/7294/5058/5525/9961/2932/11035/25865	28
BP	GO:0018105	peptidyl-serine phosphorylation	34/816	310/18862	6.55e-07	0.000104558	8.58e-05	10456/5728/5594/9770/8569/1147/5165/51719/5595/6850/8851/3326/2872/8408/23031/5894/6195/1453/3059/11011/9647/5591/1432/5613/5058/10044/2932/5008/5603/26524/9252/7048/5580/25865	34
BP	GO:0032757	positive regulation of interleukin-8 production	13/816	57/18862	7.08e-07	0.000109599	9e-05	51311/7099/6850/7097/6774/7100/929/2150/29108/2219/3304/51284/25865	13
BP	GO:0071900	regulation of protein serine/threonine kinase activity	46/816	492/18862	8.04e-07	0.000119868	9.84e-05	7039/11213/5728/2629/5899/5594/6647/10636/7099/51719/5573/101/5595/1050/6850/8851/7311/3326/894/2357/150290/9043/54956/4067/6233/60675/728/22924/10221/10333/1432/28988/4296/5058/8682/1032/9802/4616/29108/11214/57493/26524/5580/11183/896/1843	46
BP	GO:0002758	innate immune response-activating signal transduction	19/816	119/18862	8.21e-07	0.000119868	9.84e-05	338339/8454/5721/3055/1147/26253/6850/7305/5894/2033/5686/5699/4067/5058/5701/5691/2219/9252/5580	19
BP	GO:0032928	regulation of superoxide anion generation	8/816	20/18862	9.39e-07	0.00013333	0.000109471	6647/3684/6850/7305/2771/57126/2150/5580	8
BP	GO:0018209	peptidyl-serine modification	35/816	333/18862	1.22e-06	0.000169001	0.000138758	10456/5728/5594/9770/8569/1147/5165/51719/5595/6850/8851/3326/2872/8408/23031/5894/6195/1453/3059/11011/8693/9647/5591/1432/5613/5058/10044/2932/5008/5603/26524/9252/7048/5580/25865	35
BP	GO:0051092	positive regulation of NF-kappaB transcription factor activity	22/816	159/18862	1.42e-06	0.000185492	0.000152298	11213/28232/1147/7099/101/1524/8809/8837/7311/7097/2319/6774/6233/81603/8807/10211/10333/29108/11035/9252/3304/25865	22
BP	GO:0032868	response to insulin	31/816	278/18862	1.42e-06	0.000185492	0.000152298	5728/528/11031/5791/8660/533/8837/7097/523/81565/2771/9021/6272/79746/4067/526/2529/51382/5591/535/25948/5058/9114/2932/6548/133/5140/5580/896/5296/22937	31
BP	GO:2000379	positive regulation of reactive oxygen species metabolic process	17/816	101/18862	1.45e-06	0.000185492	0.000152298	1785/6647/3684/7099/6850/3326/7305/2771/6648/10333/57126/1432/2150/23564/11035/7048/5580	17
BP	GO:0002755	MyD88-dependent toll-like receptor signaling pathway	10/816	35/18862	1.49e-06	0.0001856	0.000152387	11213/51311/7099/51135/7311/7097/6233/7100/929/10333	10
BP	GO:0038093	Fc receptor signaling pathway	28/816	239/18862	1.73e-06	0.000210497	0.000172829	961/8454/5594/5721/7454/3055/1147/5595/10094/5534/6850/9846/3326/5335/2268/5686/5699/4067/1398/10097/10552/10451/5058/5701/2205/5691/5580/5296	28
BP	GO:0016236	macroautophagy	33/816	311/18862	1.99e-06	0.00023679	0.000194416	90410/2629/5899/528/5868/57533/5861/55062/5595/10533/27243/533/89849/8851/58476/523/58528/8408/9517/79720/526/9525/826/55048/10241/51382/535/54543/339122/4864/9114/51506/9140	33
BP	GO:0071346	cellular response to interferon-gamma	23/816	177/18862	2.49e-06	0.000289218	0.000237462	961/7454/3055/7099/5724/3460/3326/7097/3459/383/9021/10097/3661/81603/7791/3117/7294/339122/818/3126/5580/3133/55647	23
BP	GO:0005996	monosaccharide metabolic process	30/816	272/18862	2.63e-06	0.00029876	0.000245296	55276/2548/6888/5209/5208/5509/5226/3101/10269/5165/8660/84649/7086/9446/5236/2539/2033/6515/1528/10295/2529/5210/10296/90007/25948/1432/2821/5500/2932/51547	30
BP	GO:0050852	T cell receptor signaling pathway	25/816	204/18862	2.73e-06	0.000302952	0.000248739	50852/8454/5594/5721/7454/1147/4068/5335/84106/5686/5699/7805/5293/11126/3117/7294/5058/5701/64332/5691/3635/3126/920/25865/5296	25
BP	GO:2000377	regulation of reactive oxygen species metabolic process	24/816	192/18862	3.03e-06	0.000325856	0.000267543	961/1785/6647/3684/7099/5165/6850/1524/8837/3326/7305/2771/2539/240/6648/10333/57126/5880/1432/2150/23564/11035/7048/5580	24
BP	GO:0043303	mast cell degranulation	11/816	46/18862	3.09e-06	0.000325856	0.000267543	6850/9846/5729/2268/201294/4067/5293/2242/5880/5730/3566	11
BP	GO:0002220	innate immune response activating cell surface receptor signaling pathway	18/816	118/18862	3.13e-06	0.000325856	0.000267543	338339/8454/5721/1147/26253/6850/7305/5894/2033/5686/5699/4067/5058/5701/5691/2219/9252/5580	18
BP	GO:0043302	positive regulation of leukocyte degranulation	8/816	23/18862	3.26e-06	0.000332798	0.000273243	3684/5724/6850/9846/2268/57126/2150/3566	8
BP	GO:0002888	positive regulation of myeloid leukocyte mediated immunity	7/816	17/18862	3.67e-06	0.000368038	0.000302177	3684/5724/7305/383/57126/2150/3133	7
BP	GO:0002279	mast cell activation involved in immune response	11/816	47/18862	3.88e-06	0.000373732	0.000306852	6850/9846/5729/2268/201294/4067/5293/2242/5880/5730/3566	11
BP	GO:0002448	mast cell mediated immunity	11/816	47/18862	3.88e-06	0.000373732	0.000306852	6850/9846/5729/2268/201294/4067/5293/2242/5880/5730/3566	11
BP	GO:0016311	dephosphorylation	44/816	491/18862	4.25e-06	0.000402178	0.000330207	5209/5728/2629/5208/131870/5509/6418/5791/5520/9150/5534/132160/52/3326/8178/2771/10421/150290/85464/5210/249/9647/2280/134510/51205/5531/221692/5525/818/5514/5500/10507/5537/23645/54434/2932/3635/23381/11035/5580/10106/11284/3613/1843	44
BP	GO:0007265	Ras protein signal transduction	34/816	338/18862	4.59e-06	0.000413819	0.000339766	83478/5899/1785/7454/9448/5911/1147/9922/6016/8660/5337/391/5894/22898/397/4067/5863/604/1398/9046/4851/285282/10602/10211/5880/1432/28988/4650/2150/23550/11214/19/57493/5922	34
BP	GO:0051258	protein polymerization	31/816	294/18862	4.61e-06	0.000413819	0.000339766	10456/1785/9168/7454/3055/10094/27243/8851/57580/6840/81565/22921/85464/79585/10097/22924/2879/1453/10602/10552/3059/2242/28988/5058/2314/11151/29108/54434/58526/5580/3304	31
BP	GO:0006401	RNA catabolic process	39/816	414/18862	4.62e-06	0.000413819	0.000339766	5721/6218/131870/6418/6556/5520/6152/7311/6039/6154/4849/6137/5686/5699/6138/6233/6741/9704/56339/22882/54890/6136/6041/1432/5701/55095/5691/162989/8635/23381/22803/4904/53918/5580/3304/5393/22849/7133/7538	39
BP	GO:0032535	regulation of cellular component size	36/816	370/18862	5.19e-06	0.00045704	0.000375252	10456/5728/1785/5868/9168/7454/64218/3055/10094/8851/3326/57580/6840/81565/85464/56996/10097/10602/10552/3059/92960/10451/28988/5058/2314/6696/2150/10507/23645/79890/11151/29108/54434/2932/9856/5580	36
BP	GO:0038061	NIK/NF-kappaB signaling	23/816	185/18862	5.31e-06	0.000459946	0.000377638	602/8454/5721/9770/1147/7099/9516/8809/7097/2033/5686/5699/7805/81/929/10333/8740/5531/5701/5691/11035/51284/4792	23
BP	GO:0031663	lipopolysaccharide-mediated signaling pathway	12/816	58/18862	5.64e-06	0.000480194	0.000394263	5594/3055/7099/5724/5595/7097/4067/3661/10221/929/1432/4792	12
BP	GO:0032147	activation of protein kinase activity	33/816	328/18862	6.3e-06	0.000527723	0.000433286	7039/5594/6647/9448/6556/7099/51719/5573/5595/6850/8851/7311/2357/9043/5894/6233/4215/60675/1398/728/196883/10333/1432/28988/4296/5058/8682/4616/11035/55615/7048/5580/11183	33
BP	GO:0032970	regulation of actin filament-based process	37/816	389/18862	6.48e-06	0.000534185	0.000438592	961/10456/9168/389/7454/3055/10094/391/8851/57580/6840/397/85464/1398/10097/8500/10602/10552/3059/9647/2242/5880/28988/5058/2314/1824/2150/6624/3759/4089/11151/29108/11214/54434/6548/5580/4627	37
BP	GO:0060759	regulation of response to cytokine stimulus	23/816	189/18862	7.61e-06	0.000612406	0.000502815	11213/10555/1147/7099/6850/3460/3326/7097/3459/383/9021/7850/7805/837/3661/56339/3455/6041/7132/7294/2150/29108/3304	23
BP	GO:0007033	vacuole organization	22/816	176/18862	7.75e-06	0.000612406	0.000502815	2548/90410/2131/2629/5899/5868/57533/5861/55062/10533/89849/58476/8408/7805/339122/7942/219931/8720/11151/19/9140/55647	22
BP	GO:0060333	interferon-gamma-mediated signaling pathway	15/816	91/18862	7.79e-06	0.000612406	0.000502815	3055/5724/3460/3326/3459/383/9021/3661/81603/3117/7294/818/3126/5580/3133	15
BP	GO:0002223	stimulatory C-type lectin receptor signaling pathway	17/816	114/18862	7.98e-06	0.000617658	0.000507127	338339/8454/5721/1147/26253/6850/7305/5894/2033/5686/5699/4067/5058/5701/5691/9252/5580	17
BP	GO:0045785	positive regulation of cell adhesion	39/816	425/18862	8.57e-06	0.000639198	0.000524813	961/1785/9448/80005/5724/101/54518/6850/57580/2319/6484/201294/8876/1378/8728/4067/240/604/1398/2529/11126/9647/10211/10451/4739/8740/5058/3566/3678/11151/29108/2932/64332/7048/7704/920/25865/3133/30008	39
BP	GO:0032637	interleukin-8 production	16/816	103/18862	8.6e-06	0.000639198	0.000524813	602/5861/51311/7099/6850/7097/6774/7100/929/10333/2150/29108/2219/3304/51284/25865	16
BP	GO:0019058	viral life cycle	34/816	348/18862	8.63e-06	0.000639198	0.000524813	3836/5868/5861/6732/9189/27243/89849/7311/3326/9972/79720/1378/6233/23633/81603/9525/4851/55048/9080/290/57132/10581/6041/339122/5093/4864/219931/3678/81559/27350/2219/2060/3304/920	34
BP	GO:0051403	stress-activated MAPK cascade	28/816	261/18862	9.54e-06	0.000695939	0.0005714	8454/5594/9770/9448/5911/1147/7099/5595/51135/6688/6850/7311/4055/9043/6233/4215/10221/1432/28988/4296/2150/4616/29108/10044/5603/11183/1843/7538	28
BP	GO:0002699	positive regulation of immune effector process	25/816	219/18862	9.7e-06	0.000698201	0.000573257	3684/7099/5724/6850/4068/8809/9846/7305/2268/383/201294/1378/4067/7805/8807/11126/57126/2242/5880/2821/2150/3566/64332/81545/3133	25
BP	GO:0090066	regulation of anatomical structure size	43/816	493/18862	1.07e-05	0.000759935	0.000623943	2131/10456/5728/1785/5868/9168/7454/6647/64218/3055/80005/5724/10094/8851/3326/57580/5023/6840/81565/85464/56996/10097/10602/10552/3059/6648/92960/10451/28988/5058/2314/6696/2150/10507/23645/79890/11151/29108/54434/2932/9856/133/5580	43
BP	GO:0032956	regulation of actin cytoskeleton organization	34/816	352/18862	1.1e-05	0.000768909	0.000631311	961/10456/9168/389/7454/3055/10094/391/8851/57580/6840/397/85464/1398/10097/8500/10602/10552/3059/9647/2242/5880/28988/5058/2314/2150/6624/4089/11151/29108/11214/54434/6548/5580	34
BP	GO:0071347	cellular response to interleukin-1	22/816	180/18862	1.11e-05	0.000768909	0.000631311	961/11213/8454/5721/1147/5595/51135/7311/57161/5686/5699/7850/6233/4215/1051/54472/5701/29108/5691/5603/9252/4792	22
BP	GO:0002697	regulation of immune effector process	41/816	465/18862	1.33e-05	0.000902692	0.000741154	961/11213/7454/10269/3684/7099/5724/6850/4068/8809/9846/7305/2268/383/201294/1378/84106/4067/7805/604/1398/728/2529/8807/11126/5591/57126/2242/5880/2821/2150/3566/966/29108/64332/9984/11035/712/7133/81545/3133	41
BP	GO:0071375	cellular response to peptide hormone stimulus	32/816	325/18862	1.35e-05	0.000906383	0.000744184	5728/528/11031/5791/5573/8660/533/8837/523/81565/2771/6774/383/9021/79746/4067/526/1398/2529/57085/51382/196883/5591/535/5058/9114/2932/6548/5140/5580/896/5296	32
BP	GO:0071902	positive regulation of protein serine/threonine kinase activity	31/816	311/18862	1.44e-05	0.000953455	0.000782833	7039/5899/5594/6647/7099/51719/101/5595/6850/8851/7311/3326/894/2357/9043/54956/6233/60675/728/22924/10333/1432/28988/4296/5058/8682/9802/4616/11214/11183/896	31
BP	GO:0007015	actin filament organization	39/816	435/18862	1.47e-05	0.000960913	0.000788956	961/10456/9168/389/7454/1495/3055/10094/391/57580/6840/22921/4082/85464/79585/4542/10097/7791/3936/8500/10602/10552/3059/9647/55909/4739/5880/28988/221692/5058/2314/2150/6624/11151/29108/54434/6548/64780/5580	39
BP	GO:0017157	regulation of exocytosis	23/816	197/18862	1.51e-05	0.000977703	0.000802741	5868/134957/3684/5724/27243/6850/9846/9545/5023/2771/2268/201294/84106/4067/9525/4851/57126/2242/5880/2150/3566/2932/64780	23
BP	GO:0070661	leukocyte proliferation	31/816	312/18862	1.53e-05	0.000977927	0.000802925	2323/2629/5594/6556/7099/5573/5595/8660/6850/7305/383/1378/5699/4067/1051/604/10451/8740/5880/6655/2150/11151/29108/3635/11035/7048/5580/896/920/7133/3133	31
BP	GO:0045921	positive regulation of exocytosis	14/816	85/18862	1.57e-05	0.000990547	0.000813288	5868/134957/3684/5724/27243/6850/9846/9545/2268/201294/9525/57126/2150/3566	14
BP	GO:0032869	cellular response to insulin stimulus	25/816	226/18862	1.68e-05	0.00103846	0.00085263	5728/528/11031/5791/8660/533/8837/523/81565/2771/9021/79746/526/2529/51382/5591/535/5058/9114/2932/6548/5140/5580/896/5296	25
BP	GO:0090383	phagosome acidification	8/816	28/18862	1.7e-05	0.00103846	0.00085263	528/533/523/526/51382/535/9114/55647	8
BP	GO:0006402	mRNA catabolic process	35/816	375/18862	1.72e-05	0.00103846	0.00085263	5721/6218/131870/6418/6556/5520/6152/7311/6154/4849/6137/5686/5699/6138/6233/6741/9704/56339/22882/54890/6136/6041/1432/5701/55095/5691/23381/22803/4904/53918/5580/3304/5393/22849/7538	35
BP	GO:0032677	regulation of interleukin-8 production	15/816	97/18862	1.73e-05	0.00103846	0.00085263	602/51311/7099/6850/7097/6774/7100/929/10333/2150/29108/2219/3304/51284/25865	15
BP	GO:0048013	ephrin receptor signaling pathway	14/816	86/18862	1.8e-05	0.00107065	0.000879052	23294/4318/55851/10094/8851/4067/83464/1398/10097/10552/10451/26037/5058/1175	14
BP	GO:0044262	cellular carbohydrate metabolic process	29/816	288/18862	2.23e-05	0.00130876	0.00107456	55276/2548/2131/5209/5728/5208/9334/5509/5226/8972/3101/10269/5165/5724/8660/84649/5236/2033/2710/10295/5210/10296/90007/27235/5500/5256/2932/51547/3613	29
BP	GO:0043304	regulation of mast cell degranulation	8/816	29/18862	2.26e-05	0.00131378	0.00107868	6850/9846/2268/201294/4067/2242/5880/3566	8
BP	GO:0032481	positive regulation of type I interferon production	13/816	77/18862	2.39e-05	0.00137215	0.0011266	1147/51311/7099/6850/7097/3148/2033/3661/5591/929/10211/10623/51284	13
BP	GO:0007159	leukocyte cell-cell adhesion	34/816	366/18862	2.49e-05	0.0014096	0.00115735	2131/961/5573/5724/101/6850/1524/2319/6484/383/8876/1378/4067/7805/240/1051/604/2529/11126/57126/8740/5880/5058/10507/3566/3678/11151/29108/64332/79626/7048/7704/920/3133	34
BP	GO:0034504	protein localization to nucleus	28/816	275/18862	2.51e-05	0.0014096	0.00115735	602/3836/5594/149628/1495/6850/3326/6774/9972/51307/23633/81603/3059/1432/1861/5514/23534/8720/3985/2932/10694/10628/26524/54971/7704/5580/4792/5296	28
BP	GO:0043254	regulation of protein-containing complex assembly	39/816	446/18862	2.58e-05	0.00142365	0.00116889	10456/2629/5899/9168/389/7454/134957/3055/7099/10094/6850/8851/57580/6840/8408/5894/2033/85464/10097/22924/3936/10602/10552/3059/8451/10333/2242/28988/5058/2314/5701/6624/11151/29108/54434/2932/19/5580/3304	39
BP	GO:0051170	import into nucleus	20/816	163/18862	2.61e-05	0.00142365	0.00116889	3836/5594/6633/6850/3326/6774/9972/79833/51307/23633/3059/10553/1432/5514/23534/8720/10628/5580/4792/5296	20
BP	GO:0046578	regulation of Ras protein signal transduction	22/816	190/18862	2.62e-05	0.00142365	0.00116889	83478/1785/9448/9922/8660/5894/22898/397/4067/5863/604/1398/4851/285282/10211/4650/2150/23550/11214/19/57493/5922	22
BP	GO:0060326	cell chemotaxis	30/816	306/18862	2.7e-05	0.0014513	0.00119159	58191/5594/23604/101/5595/391/6850/1524/57580/3148/4067/240/1398/9943/728/5293/4851/51192/63940/158747/10451/5880/2150/1441/51411/79890/11151/5580/25865/1843	30
BP	GO:0001959	regulation of cytokine-mediated signaling pathway	21/816	177/18862	2.75e-05	0.00146565	0.00120337	11213/10555/1147/6850/3460/3326/3459/383/9021/7850/7805/837/3661/56339/3455/6041/7132/7294/2150/29108/3304	21
BP	GO:0071216	cellular response to biotic stimulus	25/816	233/18862	2.82e-05	0.00147616	0.001212	5594/3055/10269/7099/5724/5595/6850/9516/1524/7097/383/3148/4067/1051/3661/10221/929/10333/1432/29108/2932/10628/7133/4792/7538	25
BP	GO:0031331	positive regulation of cellular catabolic process	35/816	384/18862	2.83e-05	0.00147616	0.001212	26234/5209/5728/2629/5899/5208/149628/101/5595/8660/1050/58476/8408/9517/10645/7805/22926/81603/10221/79699/1453/5210/56339/10241/207063/7942/5701/9528/2932/5580/3304/22849/7133/7538/3300	35
BP	GO:0043405	regulation of MAP kinase activity	30/816	307/18862	2.87e-05	0.00148143	0.00121632	7039/11213/2629/5594/6647/10636/7099/101/5595/6850/7311/2357/150290/9043/4067/6233/60675/728/10221/10333/1432/28988/4296/5058/8682/4616/11214/5580/11183/1843	30
BP	GO:0033006	regulation of mast cell activation involved in immune response	8/816	30/18862	2.97e-05	0.00151709	0.0012456	6850/9846/2268/201294/4067/2242/5880/3566	8
BP	GO:1902903	regulation of supramolecular fiber organization	34/816	370/18862	3.11e-05	0.00156533	0.00128521	961/10456/9168/389/7454/3055/10094/8851/57580/6840/85464/10097/22924/8500/10602/10552/3059/9647/2242/28988/5058/2314/2150/4089/11151/29108/11214/54434/58526/6548/10300/5580/3304/30008	34
BP	GO:0002433	immune response-regulating cell surface receptor signaling pathway involved in phagocytosis	18/816	139/18862	3.16e-05	0.00156533	0.00128521	961/5594/7454/3055/5595/10094/6850/3326/5335/2268/4067/1398/10097/10552/10451/5058/5580/5296	18
BP	GO:0038096	Fc-gamma receptor signaling pathway involved in phagocytosis	18/816	139/18862	3.16e-05	0.00156533	0.00128521	961/5594/7454/3055/5595/10094/6850/3326/5335/2268/4067/1398/10097/10552/10451/5058/5580/5296	18
BP	GO:0042116	macrophage activation	15/816	102/18862	3.19e-05	0.00156533	0.00128521	6556/51311/3684/7099/8291/1050/6850/7097/3459/7305/728/10333/3566/51284/712	15
BP	GO:0006913	nucleocytoplasmic transport	32/816	340/18862	3.31e-05	0.00160971	0.00132165	3836/5594/6633/10636/23214/6850/3326/6774/9972/79833/6741/51307/23633/3059/10553/54890/1432/5514/23534/8720/11214/1984/2932/9984/23381/10628/5580/26993/4792/51547/10541/5296	32
BP	GO:0043434	response to peptide hormone	38/816	435/18862	3.34e-05	0.00160971	0.00132165	5728/528/11031/5791/1147/5573/8660/533/8837/7097/523/81565/2771/6774/383/9021/6272/79746/4067/526/1398/2529/57085/51382/196883/5591/535/25948/5058/9114/2932/6548/133/5140/5580/896/5296/22937	38
BP	GO:0038094	Fc-gamma receptor signaling pathway	18/816	140/18862	3.48e-05	0.0016627	0.00136516	961/5594/7454/3055/5595/10094/6850/3326/5335/2268/4067/1398/10097/10552/10451/5058/5580/5296	18
BP	GO:0032496	response to lipopolysaccharide	31/816	326/18862	3.6e-05	0.00169886	0.00139485	11213/5594/3055/6556/1147/7099/5724/5595/9516/1524/7097/383/3454/3148/4067/1051/7056/728/3661/4851/10221/249/6648/929/1432/29108/133/7133/55593/4792/7538	31
BP	GO:0002221	pattern recognition receptor signaling pathway	23/816	208/18862	3.62e-05	0.00169886	0.00139485	11213/51296/1147/51311/3684/7099/51135/26253/7311/7097/4067/6233/7100/3661/929/10211/10333/2150/2219/3304/51284/4792/285852	23
BP	GO:0051169	nuclear transport	32/816	343/18862	3.93e-05	0.00182716	0.00150019	3836/5594/6633/10636/23214/6850/3326/6774/9972/79833/6741/51307/23633/3059/10553/54890/1432/5514/23534/8720/11214/1984/2932/9984/23381/10628/5580/26993/4792/51547/10541/5296	32
BP	GO:1901653	cellular response to peptide	35/816	391/18862	4.11e-05	0.00187285	0.0015377	5728/528/11031/5791/7099/5573/8660/533/8837/523/81565/2771/6774/383/9021/79746/4067/526/1398/837/2529/57085/51382/196883/5591/10333/535/5058/9114/2932/6548/5140/5580/896/5296	35
BP	GO:0019068	virion assembly	9/816	40/18862	4.15e-05	0.00187285	0.0015377	5861/27243/7311/79720/6233/9525/55048/57132/339122	9
BP	GO:0043123	positive regulation of I-kappaB kinase/NF-kappaB signaling	21/816	182/18862	4.18e-05	0.00187285	0.0015377	389/124583/1147/7099/51135/57708/9516/8837/4055/57161/57153/4215/3661/81603/2280/10333/7132/2150/11214/920/6275	21
BP	GO:0045123	cellular extravasation	12/816	70/18862	4.18e-05	0.00187285	0.0015377	2131/961/5724/101/1524/6484/1398/2529/5293/57126/4267/11035	12
BP	GO:0006605	protein targeting	38/816	441/18862	4.49e-05	0.00199643	0.00163916	51304/10456/6218/3684/3305/8239/6152/22879/8851/7311/6154/84243/6137/27342/79720/134266/6272/6138/6233/7805/293/84885/55048/64089/9454/6136/5880/54543/5058/130617/4666/8031/55825/100287932/10300/196294/3295/131540	38
BP	GO:0045576	mast cell activation	11/816	60/18862	4.57e-05	0.00201139	0.00165145	6850/9846/5729/2268/201294/4067/5293/2242/5880/5730/3566	11
BP	GO:0008286	insulin receptor signaling pathway	18/816	143/18862	4.63e-05	0.0020165	0.00165565	528/5791/8660/533/523/81565/2771/9021/526/2529/51382/535/5058/9114/2932/5580/896/5296	18
BP	GO:0002237	response to molecule of bacterial origin	32/816	346/18862	4.66e-05	0.0020165	0.00165565	11213/5594/3055/6556/1147/7099/5724/5595/9516/1524/7097/383/3454/3148/4067/1051/7056/728/3661/4851/10221/249/6648/929/10333/1432/29108/133/7133/55593/4792/7538	32
BP	GO:0090322	regulation of superoxide metabolic process	8/816	32/18862	4.94e-05	0.00211642	0.00173768	6647/3684/6850/7305/2771/57126/2150/5580	8
BP	GO:0002224	toll-like receptor signaling pathway	19/816	157/18862	4.98e-05	0.00211642	0.00173768	11213/1147/51311/3684/7099/51135/7311/7097/4067/6233/7100/3661/929/10211/10333/2150/51284/4792/285852	19
BP	GO:0009251	glucan catabolic process	7/816	24/18862	5.01e-05	0.00211642	0.00173768	55276/2548/5509/8972/5236/5500/5256	7
BP	GO:0050867	positive regulation of cell activation	36/816	412/18862	5.31e-05	0.00222488	0.00182674	338339/2323/961/3684/7099/5724/101/8660/1050/6850/9846/7305/2319/2268/8876/1378/4067/604/6195/11126/5591/10333/10451/57126/8740/5058/2150/3566/11151/29108/64332/3635/7048/7704/920/3133	36
BP	GO:0046686	response to cadmium ion	11/816	61/18862	5.36e-05	0.00222488	0.00182674	4318/5594/6647/1147/5595/4520/383/1528/6648/4864/4521	11
BP	GO:1903307	positive regulation of regulated secretory pathway	10/816	51/18862	5.54e-05	0.00226059	0.00185606	3684/5724/6850/9846/9545/2268/201294/57126/2150/3566	10
BP	GO:1902563	regulation of neutrophil activation	5/816	11/18862	5.56e-05	0.00226059	0.00185606	3684/5724/6850/84106/57126	5
BP	GO:0002431	Fc receptor mediated stimulatory signaling pathway	18/816	145/18862	5.58e-05	0.00226059	0.00185606	961/5594/7454/3055/5595/10094/6850/3326/5335/2268/4067/1398/10097/10552/10451/5058/5580/5296	18
BP	GO:0030851	granulocyte differentiation	8/816	33/18862	6.28e-05	0.00248622	0.00204131	10456/3930/1050/6688/10221/3059/8451/3635	8
BP	GO:0032728	positive regulation of interferon-beta production	8/816	33/18862	6.28e-05	0.00248622	0.00204131	51311/7099/7097/3148/3661/10211/10623/51284	8
BP	GO:0050869	negative regulation of B cell activation	8/816	33/18862	6.28e-05	0.00248622	0.00204131	7305/1378/4067/7805/604/64092/3635/9984	8
BP	GO:0022604	regulation of cell morphogenesis	29/816	305/18862	6.37e-05	0.00250337	0.00205539	118987/1785/389/64218/3055/80005/10269/391/51177/57580/2268/201294/9043/1398/121512/10097/10602/752/5591/81/4739/2242/5880/28988/55843/10507/11151/89846/4627	29
BP	GO:0044247	cellular polysaccharide catabolic process	7/816	25/18862	6.7e-05	0.0025944	0.00213013	55276/2548/5509/8972/5236/5500/5256	7
BP	GO:0051156	glucose 6-phosphate metabolic process	7/816	25/18862	6.7e-05	0.0025944	0.00213013	55276/6888/5226/3101/7086/2539/2821	7
BP	GO:0002696	positive regulation of leukocyte activation	35/816	401/18862	6.87e-05	0.00261927	0.00215055	338339/2323/961/3684/7099/5724/101/8660/1050/6850/9846/7305/2319/2268/8876/1378/4067/604/11126/5591/10333/10451/57126/8740/5058/2150/3566/11151/29108/64332/3635/7048/7704/920/3133	35
BP	GO:0009896	positive regulation of catabolic process	38/816	450/18862	6.91e-05	0.00261927	0.00215055	26234/5209/5728/2629/5899/5208/149628/101/5595/8660/1050/10533/58476/57520/8408/9517/10645/7805/22926/81603/10221/79699/1453/5210/56339/10241/207063/7942/5701/9528/2932/25976/5580/3304/22849/7133/7538/3300	38
BP	GO:0030217	T cell differentiation	25/816	246/18862	6.92e-05	0.00261927	0.00215055	602/2629/6647/64218/101/6850/3955/8809/57580/6774/8876/1378/604/2529/5293/285282/56339/5591/6655/3566/64332/11035/7048/7704/920	25
BP	GO:0097530	granulocyte migration	18/816	148/18862	7.31e-05	0.00274545	0.00225415	5594/23604/101/5595/51135/391/6850/57580/728/2529/5293/51192/158747/10451/57126/5880/4267/1441	18
BP	GO:0050851	antigen receptor-mediated signaling pathway	30/816	323/18862	7.37e-05	0.00274793	0.00225619	660/50852/8454/5594/5721/7454/1147/6850/4068/5335/84106/5686/5699/4067/7805/5293/11126/10451/1998/3117/7294/5058/5701/64332/5691/3635/3126/920/25865/5296	30
BP	GO:0097529	myeloid leukocyte migration	23/816	218/18862	7.54e-05	0.00279167	0.00229209	961/5594/23604/101/5595/51135/391/6850/1524/57580/4067/728/2529/5293/51192/158747/10451/57126/5880/4267/1441/79890/1843	23
BP	GO:0010614	negative regulation of cardiac muscle hypertrophy	8/816	34/18862	7.9e-05	0.00290378	0.00238414	9150/2539/4851/3720/7132/5058/4089/7133	8
BP	GO:0051701	biological process involved in interaction with host	23/816	219/18862	8.09e-05	0.00293792	0.00241218	3836/10533/27243/8408/9972/79720/1378/23633/81603/9525/9080/290/10581/6256/4864/219931/3678/81559/9984/2219/2060/3304/920	23
BP	GO:1990266	neutrophil migration	16/816	123/18862	8.11e-05	0.00293792	0.00241218	23604/101/51135/391/6850/57580/728/2529/5293/51192/158747/10451/57126/5880/4267/1441	16
BP	GO:0006470	protein dephosphorylation	30/816	325/18862	8.24e-05	0.00296541	0.00243475	5728/2629/5509/6418/5791/5520/9150/5534/132160/52/3326/2771/150290/85464/9647/2280/134510/5531/221692/5525/818/5514/5500/5537/23645/54434/2932/5580/10106/1843	30
BP	GO:0002685	regulation of leukocyte migration	22/816	205/18862	8.33e-05	0.00297685	0.00244414	5594/23604/5724/101/5595/391/1524/6484/4067/1398/9943/728/2529/63940/158747/5880/4267/2150/79890/29108/11035/1843	22
BP	GO:0070555	response to interleukin-1	22/816	206/18862	8.96e-05	0.00317775	0.00260909	961/11213/8454/5721/1147/5595/51135/7311/57161/5686/5699/7850/6233/4215/1051/54472/5701/29108/5691/5603/9252/4792	22
BP	GO:0050863	regulation of T cell activation	30/816	327/18862	9.21e-05	0.00324426	0.00266369	961/6647/5573/101/6850/2319/383/8876/1378/4067/7805/1051/604/11126/56339/8740/5880/6655/5058/3566/11151/29108/64332/11035/79626/7048/7704/920/7133/3133	30
BP	GO:0072593	reactive oxygen species metabolic process	27/816	281/18862	9.44e-05	0.00329312	0.00270381	961/1785/6647/3684/7099/5165/6850/1524/8837/3326/57580/7097/7305/2771/2539/240/4689/6648/10333/57126/5880/1432/2150/23564/11035/7048/5580	27
BP	GO:0008360	regulation of cell shape	18/816	151/18862	9.5e-05	0.00329312	0.00270381	389/64218/3055/10269/391/51177/2268/1398/121512/10602/752/2242/5880/55843/10507/11151/89846/4627	18
BP	GO:0051091	positive regulation of DNA-binding transcription factor activity	26/816	266/18862	9.56e-05	0.00329312	0.00270381	11213/5728/28232/1147/7099/101/1524/8809/8837/7311/7097/2319/6774/2033/6233/81603/8807/3059/10211/10333/29108/11035/6883/9252/3304/25865	26
BP	GO:0032609	interferon-gamma production	15/816	112/18862	9.6e-05	0.00329312	0.00270381	602/961/6556/51311/7099/8809/1378/7805/11126/929/7294/2150/29108/11035/51284	15
BP	GO:0042554	superoxide anion generation	8/816	35/18862	9.86e-05	0.00335694	0.00275621	6647/3684/6850/7305/2771/57126/2150/5580	8
BP	GO:0046651	lymphocyte proliferation	27/816	282/18862	0.000100237	0.00338906	0.00278258	2323/6556/7099/5573/8660/6850/7305/383/1378/5699/4067/1051/604/10451/8740/5880/6655/11151/29108/3635/11035/7048/5580/896/920/7133/3133	27
BP	GO:0002532	production of molecular mediator involved in inflammatory response	13/816	88/18862	0.000100829	0.00338906	0.00278258	7099/6850/5023/6774/7850/4067/240/23633/63940/10333/1432/3566/29108	13
BP	GO:1903131	mononuclear cell differentiation	35/816	411/18862	0.000112104	0.00373276	0.00306477	602/2629/6647/64218/101/6688/6850/3955/8809/57580/4055/6774/8876/1378/2033/4067/1051/604/2529/5293/285282/56339/1316/5591/2242/6655/2150/3566/64332/3635/11035/7048/7704/920/4627	35
BP	GO:0006979	response to oxidative stress	37/816	444/18862	0.000112516	0.00373276	0.00306477	4318/1785/5594/6647/10636/10314/1147/7099/5595/10533/8837/4520/2539/383/22921/8876/10645/240/4689/7296/1398/9943/2879/8807/6648/10333/1861/4700/4521/29920/5603/11035/10628/5580/3304/11284/1843	37
BP	GO:0000272	polysaccharide catabolic process	7/816	27/18862	0.000114809	0.00378424	0.00310704	55276/2548/5509/8972/5236/5500/5256	7
BP	GO:0032943	mononuclear cell proliferation	27/816	285/18862	0.000119651	0.00391857	0.00321734	2323/6556/7099/5573/8660/6850/7305/383/1378/5699/4067/1051/604/10451/8740/5880/6655/11151/29108/3635/11035/7048/5580/896/920/7133/3133	27
BP	GO:0032271	regulation of protein polymerization	23/816	225/18862	0.000121945	0.00391871	0.00321745	10456/9168/7454/3055/10094/8851/57580/6840/85464/10097/22924/10602/10552/3059/2242/28988/5058/2314/11151/29108/54434/5580/3304	23
BP	GO:0014741	negative regulation of muscle hypertrophy	8/816	36/18862	0.000121956	0.00391871	0.00321745	9150/2539/4851/3720/7132/5058/4089/7133	8
BP	GO:0033572	transferrin transport	8/816	36/18862	0.000121956	0.00391871	0.00321745	1785/528/533/523/526/51382/535/9114	8
BP	GO:1903557	positive regulation of tumor necrosis factor superfamily cytokine production	13/816	90/18862	0.000127473	0.00407037	0.00334197	5005/7099/5724/101/6850/7097/3459/7305/6774/5004/929/29108/3133	13
BP	GO:0070663	regulation of leukocyte proliferation	24/816	241/18862	0.000131488	0.00417249	0.00342582	2323/5594/7099/5573/5595/8660/6850/7305/383/1378/4067/1051/604/10451/5880/6655/11151/29108/3635/11035/7048/920/7133/3133	24
BP	GO:0050727	regulation of inflammatory response	32/816	366/18862	0.000134499	0.00424169	0.00348263	961/2629/4318/6647/3055/7099/101/1050/7097/9021/4067/240/1051/604/837/2529/3661/2161/7791/63940/7132/29108/5008/838/64332/5603/79626/5580/51284/7133/4792/3133	32
BP	GO:1903706	regulation of hemopoiesis	35/816	415/18862	0.000135477	0.00424633	0.00348645	10456/9770/6647/7099/101/6688/6850/11025/7305/6774/3148/8876/1378/2033/4067/1051/604/10221/56339/3059/8451/5591/2242/1432/6655/3566/1441/64332/3635/7048/7704/3304/920/4792/7538	35
BP	GO:0002819	regulation of adaptive immune response	19/816	170/18862	0.000146147	0.00455282	0.00373809	7454/6556/8809/383/1378/962/604/2529/11126/64092/3566/29108/64332/9984/11035/920/7133/81545/3133	19
BP	GO:0046513	ceramide biosynthetic process	11/816	68/18862	0.000149148	0.00461818	0.00379175	2629/9334/8439/8869/7903/5023/6483/9517/7132/8703/5580	11
BP	GO:0006606	protein import into nucleus	17/816	143/18862	0.000152237	0.00468541	0.00384695	3836/5594/6850/3326/6774/9972/51307/23633/3059/1432/5514/23534/8720/10628/5580/4792/5296	17
BP	GO:0001774	microglial cell activation	9/816	47/18862	0.000157513	0.00473372	0.00388661	51311/3684/7097/3459/7305/728/10333/51284/712	9
BP	GO:0030225	macrophage differentiation	9/816	47/18862	0.000157513	0.00473372	0.00388661	2629/4318/1050/6688/7097/10100/10221/3059/920	9
BP	GO:0044275	cellular carbohydrate catabolic process	9/816	47/18862	0.000157513	0.00473372	0.00388661	55276/2548/5509/5226/8972/5236/2710/5500/5256	9
BP	GO:0045646	regulation of erythrocyte differentiation	9/816	47/18862	0.000157513	0.00473372	0.00388661	6688/6774/3148/4067/5591/1432/3635/3304/7538	9
BP	GO:0008154	actin polymerization or depolymerization	22/816	215/18862	0.000167398	0.00500139	0.00410638	10456/9168/7454/3055/10094/57580/6840/22921/85464/79585/10097/10602/10552/3059/28988/2314/2150/11151/29108/54434/64780/5580	22
BP	GO:0032675	regulation of interleukin-6 production	18/816	158/18862	0.000170011	0.00504516	0.00414232	961/11213/2629/51311/7099/5724/6850/7097/7305/6774/5004/1051/10333/2150/29108/3635/5603/51284	18
BP	GO:0043087	regulation of GTPase activity	39/816	487/18862	0.000170838	0.00504516	0.00414232	83478/663/134957/6647/57533/10636/26286/9236/9448/80005/9922/391/51291/64786/57580/81565/84986/397/604/1398/121512/23092/10451/4739/4650/26037/55843/2150/10507/79890/29108/89846/2932/57326/64407/201176/55357/5922/6494	39
BP	GO:0007229	integrin-mediated signaling pathway	14/816	106/18862	0.000188896	0.00554639	0.00455385	961/1495/3055/3684/6850/2268/84106/7791/10451/57126/4739/7294/3678/4627	14
BP	GO:0030041	actin filament polymerization	20/816	188/18862	0.00019408	0.00564947	0.00463849	10456/9168/7454/3055/10094/57580/6840/22921/85464/79585/10097/10602/10552/3059/28988/2314/11151/29108/54434/5580	20
BP	GO:0006801	superoxide metabolic process	11/816	70/18862	0.000194619	0.00564947	0.00463849	6647/3684/6850/57580/7305/2771/4689/6648/57126/2150/5580	11
BP	GO:0033209	tumor necrosis factor-mediated signaling pathway	19/816	174/18862	0.000198303	0.0057219	0.00469796	5721/1147/6850/4055/5686/5699/7805/837/81/8740/7132/5701/2150/4050/29108/5691/3304/7133/4792	19
BP	GO:0050764	regulation of phagocytosis	13/816	94/18862	0.000199354	0.0057219	0.00469796	961/5728/1785/11031/6647/3055/6556/8291/6850/7097/2268/2150/29108	13
BP	GO:1902105	regulation of leukocyte differentiation	26/816	279/18862	0.00020648	0.00589334	0.00483872	10456/9770/6647/7099/101/6850/11025/7305/8876/1378/4067/1051/604/10221/56339/3059/8451/5591/2242/6655/3566/64332/3635/7048/7704/920	26
BP	GO:0032649	regulation of interferon-gamma production	14/816	107/18862	0.000208847	0.00592777	0.00486699	602/961/6556/51311/7099/8809/1378/7805/11126/929/7294/29108/11035/51284	14
BP	GO:0072672	neutrophil extravasation	5/816	14/18862	0.000216182	0.00606873	0.00498272	101/2529/5293/57126/4267	5
BP	GO:0048872	homeostasis of number of cells	24/816	249/18862	0.000216189	0.00606873	0.00498272	2629/9770/6647/6218/6688/2539/6774/3148/4067/604/5293/4851/10296/3059/5591/8740/1432/6655/11151/3988/3635/11035/3304/7538	24
BP	GO:1903039	positive regulation of leukocyte cell-cell adhesion	23/816	234/18862	0.000218291	0.00609426	0.00500369	961/5724/101/6850/2319/6484/8876/1378/4067/240/604/2529/11126/8740/5058/3566/11151/29108/64332/7048/7704/920/3133	23
BP	GO:0071349	cellular response to interleukin-12	9/816	49/18862	0.000219812	0.00610336	0.00501115	961/6888/5721/6647/9446/3936/6648/7297/5306	9
BP	GO:0030641	regulation of cellular pH	13/816	95/18862	0.000221979	0.00613022	0.00503321	528/5594/6556/5595/533/523/23315/526/51382/535/9114/6548/55647	13
BP	GO:0071674	mononuclear cell migration	20/816	190/18862	0.000223722	0.00614515	0.00504547	58191/2131/961/2629/5594/101/5595/4067/240/1398/9943/728/2529/5293/51192/158747/4267/29108/11035/1843	20
BP	GO:0019318	hexose metabolic process	24/816	250/18862	0.000229606	0.00627305	0.00515047	55276/2548/5209/5208/5509/3101/10269/5165/8660/84649/5236/2539/2033/10295/2529/5210/10296/90007/25948/1432/2821/5500/2932/51547	24
BP	GO:0032635	interleukin-6 production	18/816	162/18862	0.000232869	0.00632835	0.00519588	961/11213/2629/51311/7099/5724/6850/7097/7305/6774/5004/1051/10333/2150/29108/3635/5603/51284	18
BP	GO:0035666	TRIF-dependent toll-like receptor signaling pathway	7/816	30/18862	0.000235009	0.0063527	0.00521587	1147/7099/7311/6233/3661/929/10333	7
BP	GO:0050670	regulation of lymphocyte proliferation	22/816	221/18862	0.000248024	0.00665926	0.00546757	2323/7099/5573/8660/6850/7305/383/1378/4067/1051/604/10451/5880/6655/11151/29108/3635/11035/7048/920/7133/3133	22
BP	GO:0071214	cellular response to abiotic stimulus	29/816	330/18862	0.00025026	0.00665926	0.00546757	5728/4318/1785/51311/10269/7099/51719/5724/5595/4055/6154/2033/4836/7100/9943/56339/11011/8740/1432/79085/7132/7508/3759/838/5603/6548/5580/51284/6494	29
BP	GO:0104004	cellular response to environmental stimulus	29/816	330/18862	0.00025026	0.00665926	0.00546757	5728/4318/1785/51311/10269/7099/51719/5724/5595/4055/6154/2033/4836/7100/9943/56339/11011/8740/1432/79085/7132/7508/3759/838/5603/6548/5580/51284/6494	29
BP	GO:0008625	extrinsic apoptotic signaling pathway via death domain receptors	12/816	84/18862	0.000255204	0.00675564	0.00554671	51304/5728/51202/8794/8837/3148/5894/6272/7132/8682/2932/162989	12
BP	GO:0032648	regulation of interferon-beta production	9/816	50/18862	0.000257905	0.00675712	0.00554792	51311/7099/7097/3148/3661/10211/10623/29108/51284	9
BP	GO:0070671	response to interleukin-12	9/816	50/18862	0.000257905	0.00675712	0.00554792	961/6888/5721/6647/9446/3936/6648/7297/5306	9
BP	GO:1903555	regulation of tumor necrosis factor superfamily cytokine production	18/816	164/18862	0.000271289	0.00707151	0.00580606	602/961/11213/5005/7099/5724/101/6850/1524/7097/3459/7305/6774/5004/929/29108/7538/3133	18
BP	GO:0051656	establishment of organelle localization	35/816	431/18862	0.000279184	0.00724035	0.00594468	7039/8825/2153/1785/26286/5861/23095/55062/27243/6850/9846/5729/81565/2268/201294/4067/55288/4542/10097/9525/5293/1453/81/5265/57132/2242/5880/1861/5730/3566/5537/966/3985/10300/4627	35
BP	GO:0032944	regulation of mononuclear cell proliferation	22/816	223/18862	0.000281627	0.00726683	0.00596642	2323/7099/5573/8660/6850/7305/383/1378/4067/1051/604/10451/5880/6655/11151/29108/3635/11035/7048/920/7133/3133	22
BP	GO:0017038	protein import	20/816	194/18862	0.00029513	0.00757698	0.00622106	3836/5594/6850/3326/6774/9972/134266/51307/23633/3059/1432/54543/5514/23534/8720/100287932/10628/5580/4792/5296	20
BP	GO:0016051	carbohydrate biosynthetic process	21/816	209/18862	0.000299553	0.00761401	0.00625147	55276/2131/6888/9334/5509/5226/5724/8660/84649/7086/6484/5236/2539/6483/2033/10296/2821/5500/2932/51547/3613	21
BP	GO:0071219	cellular response to molecule of bacterial origin	21/816	209/18862	0.000299553	0.00761401	0.00625147	5594/3055/7099/5724/5595/9516/1524/7097/383/3148/4067/1051/3661/10221/929/10333/1432/29108/7133/4792/7538	21
BP	GO:0031341	regulation of cell killing	13/816	98/18862	0.000303506	0.0076763	0.00630262	3684/6850/4068/3326/7305/383/1398/8807/11126/2150/966/11035/3133	13
BP	GO:0030852	regulation of granulocyte differentiation	5/816	15/18862	0.00031276	0.00785075	0.00644585	10456/10221/3059/8451/3635	5
BP	GO:0035265	organ growth	18/816	166/18862	0.000315113	0.00785075	0.00644585	2131/5728/5594/10409/6647/10269/9150/5573/2539/4851/3720/1432/5058/11214/57493/26524/7048/7059	18
BP	GO:0033003	regulation of mast cell activation	8/816	41/18862	0.000318053	0.00785075	0.00644585	6850/9846/2268/201294/4067/2242/5880/3566	8
BP	GO:0032755	positive regulation of interleukin-6 production	12/816	86/18862	0.000319156	0.00785075	0.00644585	51311/7099/5724/6850/7097/7305/6774/10333/2150/29108/5603/51284	12
BP	GO:0006006	glucose metabolic process	21/816	210/18862	0.000319624	0.00785075	0.00644585	55276/2548/5208/5509/3101/10269/5165/8660/84649/5236/2539/2033/10295/10296/90007/25948/1432/2821/5500/2932/51547	21
BP	GO:0010001	glial cell differentiation	21/816	210/18862	0.000319624	0.00785075	0.00644585	5728/2629/5594/9334/6647/7099/5595/7097/3459/9968/6774/10100/4067/728/4851/56339/23500/10419/712/7133/56978	21
BP	GO:0071260	cellular response to mechanical stimulus	11/816	74/18862	0.000321358	0.00785558	0.00644981	51311/7099/5595/4055/7100/8740/7132/3759/838/6548/51284	11
BP	GO:0071496	cellular response to external stimulus	27/816	303/18862	0.000323992	0.00788226	0.00647172	2629/5899/5594/55062/51311/7099/5595/10533/875/4055/58528/8408/4067/80315/7100/81788/8740/2242/7132/7942/1824/3759/4521/838/6548/51284/6494	27
BP	GO:1905037	autophagosome organization	13/816	99/18862	0.000335816	0.00810581	0.00665526	90410/2629/5899/5868/57533/5861/55062/10533/89849/58476/8408/339122/9140	13
BP	GO:0048017	inositol lipid-mediated signaling	20/816	196/18862	0.00033778	0.00810581	0.00665526	10456/5728/5594/5724/5595/8660/5337/9846/2268/4067/5863/5293/11126/3059/25948/2150/10507/5008/55615/5296	20
BP	GO:0071706	tumor necrosis factor superfamily cytokine production	18/816	167/18862	0.000339244	0.00810581	0.00665526	602/961/11213/5005/7099/5724/101/6850/1524/7097/3459/7305/6774/5004/929/29108/7538/3133	18
BP	GO:0030595	leukocyte chemotaxis	22/816	226/18862	0.000339527	0.00810581	0.00665526	58191/5594/23604/101/5595/6850/57580/4067/240/9943/728/5293/51192/63940/158747/10451/5880/2150/1441/79890/11151/1843	22
BP	GO:0007568	aging	27/816	304/18862	0.000341351	0.00811145	0.00665989	5728/2629/5594/6647/1495/10269/5595/6688/10533/9516/383/4215/604/6648/5591/22846/1432/3622/4521/3635/4904/133/7048/5580/712/7133/22937	27
BP	GO:0005980	glycogen catabolic process	6/816	23/18862	0.000345014	0.00816053	0.00670019	55276/2548/5509/5236/5500/5256	6
BP	GO:0032608	interferon-beta production	9/816	52/18862	0.00035058	0.00825399	0.00677692	51311/7099/7097/3148/3661/10211/10623/29108/51284	9
BP	GO:0110053	regulation of actin filament organization	25/816	273/18862	0.000353694	0.0082891	0.00680575	961/10456/9168/389/7454/3055/10094/57580/6840/85464/10097/8500/10602/10552/3059/9647/28988/5058/2314/2150/11151/29108/54434/6548/5580	25
BP	GO:0032760	positive regulation of tumor necrosis factor production	12/816	87/18862	0.000355914	0.00830303	0.00681719	5005/7099/5724/6850/7097/3459/7305/6774/5004/929/29108/3133	12
BP	GO:0071222	cellular response to lipopolysaccharide	20/816	197/18862	0.000361053	0.00835002	0.00685577	5594/3055/7099/5724/5595/9516/1524/7097/383/3148/4067/1051/3661/10221/929/1432/29108/7133/4792/7538	20
BP	GO:0022407	regulation of cell-cell adhesion	35/816	437/18862	0.000361197	0.00835002	0.00685577	961/5573/5724/101/6850/2319/6484/383/8876/1378/8728/4067/7805/240/1051/604/2529/4851/11126/56339/9647/10211/8740/1432/5058/3566/11151/29108/64332/79626/7048/7704/5580/920/3133	35
BP	GO:0045637	regulation of myeloid cell differentiation	24/816	258/18862	0.000366247	0.00835348	0.00685862	10456/9770/7099/6688/11025/7305/6774/3148/2033/4067/1051/10221/3059/8451/5591/2242/1432/1441/3635/7704/3304/920/4792/7538	24
BP	GO:0060419	heart growth	13/816	100/18862	0.00037101	0.00835348	0.00685862	5728/5594/10409/9150/5573/2539/4851/3720/1432/5058/11214/57493/7048	13
BP	GO:0000187	activation of MAPK activity	17/816	154/18862	0.000371157	0.00835348	0.00685862	7039/5594/6647/7099/5595/6850/7311/2357/9043/6233/60675/728/1432/28988/4296/8682/11183	17
BP	GO:0014065	phosphatidylinositol 3-kinase signaling	17/816	154/18862	0.000371157	0.00835348	0.00685862	10456/5728/5594/5595/8660/2268/4067/5863/5293/11126/3059/25948/2150/10507/5008/55615/5296	17
BP	GO:1902107	positive regulation of leukocyte differentiation	17/816	154/18862	0.000371157	0.00835348	0.00685862	10456/101/6850/7305/8876/1378/604/10221/3059/5591/2242/3566/64332/3635/7048/7704/920	17
BP	GO:1903708	positive regulation of hemopoiesis	17/816	154/18862	0.000371157	0.00835348	0.00685862	10456/101/6850/7305/8876/1378/604/10221/3059/5591/2242/3566/64332/3635/7048/7704/920	17
BP	GO:0062208	positive regulation of pattern recognition receptor signaling pathway	8/816	42/18862	0.000378171	0.00843702	0.0069272	51296/7099/7097/7100/10211/2150/3304/285852	8
BP	GO:1902622	regulation of neutrophil migration	8/816	42/18862	0.000378171	0.00843702	0.0069272	23604/101/391/728/2529/158747/5880/4267	8
BP	GO:0043487	regulation of RNA stability	20/816	198/18862	0.000385711	0.00856782	0.0070346	5721/6418/6556/7311/5686/5699/6233/56339/54890/6041/1432/5701/55095/5691/4904/5580/5393/22849/7133/7538	20
BP	GO:0016050	vesicle organization	29/816	339/18862	0.00039127	0.0086032	0.00706365	7039/2153/1785/26286/5861/8291/27243/10981/79720/6272/29887/9525/1453/55048/29916/5265/57132/10451/5990/55654/10228/5537/8677/966/11151/19/2060/22937/55647	29
BP	GO:0030833	regulation of actin filament polymerization	18/816	169/18862	0.000392356	0.0086032	0.00706365	10456/9168/7454/3055/10094/57580/6840/85464/10097/10602/10552/3059/28988/2314/11151/29108/54434/5580	18
BP	GO:0038095	Fc-epsilon receptor signaling pathway	18/816	169/18862	0.000392356	0.0086032	0.00706365	8454/5594/5721/1147/5595/5534/6850/9846/5335/5686/5699/4067/10451/5058/5701/2205/5691/5296	18
BP	GO:0022409	positive regulation of cell-cell adhesion	25/816	276/18862	0.000416633	0.00909649	0.00746866	961/5724/101/6850/2319/6484/8876/1378/8728/4067/240/604/2529/11126/10211/8740/5058/3566/11151/29108/64332/7048/7704/920/3133	25
BP	GO:0032479	regulation of type I interferon production	15/816	128/18862	0.000426644	0.00927542	0.00761557	1147/51311/7099/6850/7097/3148/2033/3661/5591/929/10211/10623/29108/51284/55593	15
BP	GO:0043406	positive regulation of MAP kinase activity	22/816	230/18862	0.000432805	0.00935863	0.00768389	7039/5594/6647/7099/101/5595/6850/7311/2357/9043/6233/60675/728/10333/1432/28988/4296/5058/8682/4616/11214/11183	22
BP	GO:0008064	regulation of actin polymerization or depolymerization	19/816	185/18862	0.000434135	0.00935863	0.00768389	10456/9168/7454/3055/10094/57580/6840/85464/10097/10602/10552/3059/28988/2314/2150/11151/29108/54434/5580	19
BP	GO:0006098	pentose-phosphate shunt	5/816	16/18862	0.000438791	0.00937985	0.00770132	55276/6888/5226/7086/2539	5
BP	GO:0071800	podosome assembly	5/816	16/18862	0.000438791	0.00937985	0.00770132	3055/3936/28988/6624/51411	5
BP	GO:0030004	cellular monovalent inorganic cation homeostasis	14/816	115/18862	0.000444634	0.00946516	0.00777135	528/5594/6556/5595/533/523/23315/526/51382/535/3759/9114/6548/55647	14
BP	GO:0032729	positive regulation of interferon-gamma production	10/816	65/18862	0.000449265	0.00952404	0.0078197	602/6556/51311/7099/8809/11126/929/7294/29108/51284	10
BP	GO:0032606	type I interferon production	15/816	129/18862	0.000463904	0.00976429	0.00801695	1147/51311/7099/6850/7097/3148/2033/3661/5591/929/10211/10623/29108/51284/55593	15
BP	GO:0030832	regulation of actin filament length	19/816	186/18862	0.00046442	0.00976429	0.00801695	10456/9168/7454/3055/10094/57580/6840/85464/10097/10602/10552/3059/28988/2314/2150/11151/29108/54434/5580	19
BP	GO:0006497	protein lipidation	12/816	90/18862	0.000488369	0.0102257	0.00839581	51304/2629/55062/10533/84243/4836/84885/84992/285282/65258/9140/131540	12
BP	GO:0006885	regulation of pH	13/816	103/18862	0.000495983	0.0103428	0.00849191	528/5594/6556/5595/533/523/23315/526/51382/535/9114/6548/55647	13
BP	GO:0043488	regulation of mRNA stability	19/816	188/18862	0.000530521	0.011018	0.00904633	5721/6418/6556/7311/5686/5699/6233/56339/54890/6041/1432/5701/55095/5691/4904/5580/5393/22849/7538	19
BP	GO:0002756	MyD88-independent toll-like receptor signaling pathway	7/816	34/18862	0.00053415	0.0110485	0.00907133	1147/7099/7311/6233/3661/929/10333	7
BP	GO:0051452	intracellular pH reduction	9/816	55/18862	0.000539718	0.0111186	0.00912893	528/6556/533/523/526/51382/535/9114/55647	9
BP	GO:0002262	myeloid cell homeostasis	16/816	145/18862	0.000548416	0.0112524	0.0092388	6647/6218/6688/2539/6774/3148/4067/604/5293/10296/3059/5591/1432/3635/3304/7538	16
BP	GO:1903037	regulation of leukocyte cell-cell adhesion	28/816	330/18862	0.000556865	0.0113801	0.0093436	961/5573/5724/101/6850/2319/6484/383/8876/1378/4067/7805/240/1051/604/2529/11126/8740/5058/3566/11151/29108/64332/79626/7048/7704/920/3133	28
BP	GO:0060330	regulation of response to interferon-gamma	6/816	25/18862	0.000562135	0.0113966	0.00935718	3460/3326/3459/383/9021/7294	6
BP	GO:0060334	regulation of interferon-gamma-mediated signaling pathway	6/816	25/18862	0.000562135	0.0113966	0.00935718	3460/3326/3459/383/9021/7294	6
BP	GO:0062197	cellular response to chemical stress	29/816	347/18862	0.000571409	0.0115388	0.00947395	4318/1785/5594/6647/10314/1147/7099/51719/5595/10533/8837/2539/383/8876/10645/240/4689/7296/1398/9943/8807/6648/10333/79085/29920/5603/11035/5580/3304	29
BP	GO:0016241	regulation of macroautophagy	17/816	160/18862	0.00057899	0.0116002	0.00952435	2629/5899/528/5595/533/8851/523/58528/8408/9517/526/826/10241/51382/535/4864/9114	17
BP	GO:0032680	regulation of tumor necrosis factor production	17/816	160/18862	0.00057899	0.0116002	0.00952435	602/961/11213/5005/7099/5724/6850/1524/7097/3459/7305/6774/5004/929/29108/7538/3133	17
BP	GO:0070391	response to lipoteichoic acid	4/816	10/18862	0.000592332	0.0117752	0.009668	7099/7097/929/1432	4
BP	GO:0071223	cellular response to lipoteichoic acid	4/816	10/18862	0.000592332	0.0117752	0.009668	7099/7097/929/1432	4
BP	GO:0055017	cardiac muscle tissue growth	12/816	92/18862	0.00059797	0.0118412	0.0097222	5728/5594/9150/5573/2539/4851/3720/1432/5058/11214/57493/7048	12
BP	GO:0034599	cellular response to oxidative stress	26/816	299/18862	0.000600433	0.0118441	0.00972455	4318/1785/5594/6647/10314/1147/7099/5595/10533/8837/2539/383/8876/10645/240/4689/7296/1398/8807/6648/10333/29920/5603/11035/5580/3304	26
BP	GO:0048538	thymus development	8/816	45/18862	0.000615975	0.0121039	0.0099379	5594/6647/10269/5595/5894/5591/3720/11035	8
BP	GO:0055067	monovalent inorganic cation homeostasis	17/816	161/18862	0.000621901	0.0121735	0.00999506	2131/528/5594/6556/5595/533/523/2771/23315/56996/526/51382/535/3759/9114/6548/55647	17
BP	GO:1901222	regulation of NIK/NF-kappaB signaling	13/816	106/18862	0.000654888	0.0127703	0.010485	602/9770/7099/9516/8809/7097/2033/7805/81/929/8740/51284/4792	13
BP	GO:0031146	SCF-dependent proteasomal ubiquitin-dependent protein catabolic process	12/816	93/18862	0.000660079	0.0128226	0.010528	26234/84961/8454/5721/5686/5699/8451/254170/5701/222235/5691/81545	12
BP	GO:0045862	positive regulation of proteolysis	30/816	367/18862	0.000665765	0.0128691	0.0105662	5728/2629/5721/149628/55851/101/1050/6850/8837/5023/6774/1378/4067/83464/7805/2161/10221/79699/1453/9647/5701/1509/29108/2932/27141/3304/7133/10541/4627/3300	30
BP	GO:0032640	tumor necrosis factor production	17/816	162/18862	0.000667512	0.0128691	0.0105662	602/961/11213/5005/7099/5724/6850/1524/7097/3459/7305/6774/5004/929/29108/7538/3133	17
BP	GO:0031099	regeneration	19/816	192/18862	0.000687456	0.0131544	0.0108004	3836/5728/1495/8837/81565/3482/8408/1051/728/3936/4851/55909/7294/6696/9856/133/7048/10419/4814	19
BP	GO:0048015	phosphatidylinositol-mediated signaling	19/816	192/18862	0.000687456	0.0131544	0.0108004	10456/5728/5594/5724/5595/8660/9846/2268/4067/5863/5293/11126/3059/25948/2150/10507/5008/55615/5296	19
BP	GO:0034250	positive regulation of cellular amide metabolic process	17/816	163/18862	0.000715958	0.0136096	0.0111741	602/5594/8439/5724/5595/5337/3459/6154/5611/56339/5591/7132/51335/23645/1984/5580/22849	17
BP	GO:0048640	negative regulation of developmental growth	13/816	107/18862	0.000716574	0.0136096	0.0111741	5728/64218/51316/9150/8851/2539/9043/3720/5058/6696/10507/9856/7048	13
BP	GO:0042158	lipoprotein biosynthetic process	12/816	94/18862	0.000727503	0.013766	0.0113025	51304/2629/55062/10533/84243/4836/84885/84992/285282/65258/9140/131540	12
BP	GO:0034101	erythrocyte homeostasis	14/816	121/18862	0.000745118	0.0140473	0.0115335	6218/6688/2539/6774/3148/4067/604/10296/3059/5591/1432/3635/3304/7538	14
BP	GO:0034612	response to tumor necrosis factor	27/816	320/18862	0.000754811	0.0141777	0.0116406	58191/2629/5594/5721/1147/5595/1050/6850/4055/5686/5699/7805/837/81/929/8740/1432/7132/5701/2150/4050/29108/5691/3304/7133/4792/7538	27
BP	GO:0006740	NADPH regeneration	5/816	18/18862	0.000800842	0.0149872	0.0123052	55276/6888/5226/7086/2539	5
BP	GO:0045851	pH reduction	9/816	58/18862	0.000805321	0.015016	0.0123289	528/6556/533/523/526/51382/535/9114/55647	9
BP	GO:0061013	regulation of mRNA catabolic process	20/816	210/18862	0.000817275	0.0151769	0.012461	5721/6418/6556/7311/5686/5699/6233/9704/56339/54890/6041/1432/5701/55095/5691/4904/5580/5393/22849/7538	20
BP	GO:0006879	cellular iron ion homeostasis	10/816	70/18862	0.000819893	0.0151769	0.012461	26234/8454/79901/6647/6556/523/51310/9114/4089/8031	10
BP	GO:0035722	interleukin-12-mediated signaling pathway	8/816	47/18862	0.000832714	0.0153586	0.0126102	6888/5721/6647/9446/3936/6648/7297/5306	8
BP	GO:0006612	protein targeting to membrane	20/816	211/18862	0.000867161	0.0159364	0.0130846	51304/6218/3684/6152/8851/7311/6154/84243/6137/27342/79720/6138/6233/84885/55048/6136/5058/130617/4666/131540	20
BP	GO:0000045	autophagosome assembly	12/816	96/18862	0.000879708	0.0161091	0.0132263	90410/5899/5868/57533/5861/55062/10533/89849/58476/8408/339122/9140	12
BP	GO:0043161	proteasome-mediated ubiquitin-dependent protein catabolic process	33/816	425/18862	0.000895982	0.0163485	0.0134229	26234/84961/8454/2629/5721/1050/7311/3326/9184/57520/7844/6907/5686/5699/6233/10221/79699/1453/10296/8451/254170/11011/23304/130617/5701/222235/2932/5691/55284/5887/3304/81545/3300	33
BP	GO:0030098	lymphocyte differentiation	29/816	358/18862	0.000936317	0.0170035	0.0139607	602/2629/6647/64218/101/6688/6850/3955/8809/57580/6774/8876/1378/2033/604/2529/5293/285282/56339/1316/5591/6655/3566/64332/3635/11035/7048/7704/920	29
BP	GO:0043903	regulation of biological process involved in symbiotic interaction	19/816	197/18862	0.000938537	0.0170035	0.0139607	6732/9150/27243/5432/6827/383/79720/23633/81603/9525/4851/10581/6041/2150/81559/27350/2219/920/7538	19
BP	GO:0043122	regulation of I-kappaB kinase/NF-kappaB signaling	22/816	244/18862	0.000957697	0.0172893	0.0141954	389/124583/1147/7099/51135/57708/9516/8837/4055/57161/57153/4215/3661/81603/2280/10333/7132/2150/29108/11214/920/6275	22
BP	GO:0007034	vacuolar transport	16/816	153/18862	0.000985546	0.0177294	0.0145567	27243/23295/22879/3482/79720/22898/6272/7805/9525/55048/64089/57132/81609/4864/9114/8031	16
BP	GO:0043547	positive regulation of GTPase activity	32/816	411/18862	0.00101786	0.0182464	0.0149812	83478/663/134957/57533/10636/26286/9448/80005/9922/391/51291/64786/57580/81565/84986/397/1398/23092/10451/4739/4650/26037/55843/2150/10507/79890/2932/64407/201176/55357/5922/6494	32
BP	GO:0032615	interleukin-12 production	9/816	60/18862	0.00103524	0.0184287	0.0151308	961/11213/51311/7099/6850/7097/7805/1432/4050	9
BP	GO:0032655	regulation of interleukin-12 production	9/816	60/18862	0.00103524	0.0184287	0.0151308	961/11213/51311/7099/6850/7097/7805/1432/4050	9
BP	GO:0010256	endomembrane system organization	36/816	482/18862	0.00107587	0.0190855	0.0156701	5728/10313/1785/5594/6647/5861/5520/9788/10269/5595/8291/27243/81565/9885/79720/1378/29887/9525/1453/55048/11252/55909/57132/10211/5990/1861/55654/10228/339122/79188/51411/19/5580/10419/26993/4627	36
BP	GO:0051348	negative regulation of transferase activity	25/816	296/18862	0.00114793	0.0202234	0.0166044	11213/5728/2629/10636/80851/5573/8660/1050/150290/9021/4067/5611/10221/9647/90007/5525/1032/9961/29108/2932/57493/26524/5580/1843/7538	25
BP	GO:0071356	cellular response to tumor necrosis factor	25/816	296/18862	0.00114793	0.0202234	0.0166044	2629/5594/5721/1147/5595/1050/6850/4055/5686/5699/7805/837/81/8740/1432/7132/5701/2150/4050/29108/5691/3304/7133/4792/7538	25
BP	GO:0060284	regulation of cell development	36/816	485/18862	0.00119959	0.0210276	0.0172647	8650/5728/1785/10636/64218/1495/80005/1524/8851/57580/7097/7305/81565/3148/201294/4067/1398/10097/23462/4851/10221/23500/5591/81/4739/28988/7132/5058/6696/10507/81559/4089/2932/9856/10419/7133	36
BP	GO:0014066	regulation of phosphatidylinositol 3-kinase signaling	14/816	127/18862	0.00120181	0.0210276	0.0172647	10456/5728/5594/5595/8660/2268/4067/5863/5293/3059/2150/10507/5008/55615	14
BP	GO:0120032	regulation of plasma membrane bounded cell projection assembly	18/816	186/18862	0.00121565	0.0211971	0.0174039	90410/83478/1785/5868/7454/9842/5337/391/81565/4117/10097/10602/55909/5880/2150/6624/3985/5580	18
BP	GO:0009612	response to mechanical stimulus	19/816	202/18862	0.00126439	0.0219678	0.0180367	51311/7099/5595/4055/5894/7100/8740/1432/7132/7508/3759/57053/838/6548/10628/9856/7048/51284/4792	19
BP	GO:0034656	nucleobase-containing small molecule catabolic process	8/816	50/18862	0.00126845	0.0219678	0.0180367	978/953/131870/4521/79873/27350/9583/51733	8
BP	GO:1902600	proton transmembrane transport	16/816	157/18862	0.00129718	0.0223316	0.0183353	528/206358/1345/533/523/23315/374291/55002/1528/526/51382/81/535/9114/9016/6548	16
BP	GO:1902624	positive regulation of neutrophil migration	6/816	29/18862	0.00130096	0.0223316	0.0183353	23604/101/728/158747/5880/4267	6
BP	GO:0009134	nucleoside diphosphate catabolic process	4/816	12/18862	0.00130257	0.0223316	0.0183353	953/131870/79873/9583	4
BP	GO:0032613	interleukin-10 production	9/816	62/18862	0.0013156	0.0224796	0.0184569	602/961/7099/6850/7097/7305/6774/2150/29108	9
BP	GO:0007252	I-kappaB phosphorylation	5/816	20/18862	0.00134858	0.0227665	0.0186924	1147/7099/1524/7097/51284	5
BP	GO:0097503	sialylation	5/816	20/18862	0.00134858	0.0227665	0.0186924	8869/7903/6484/6483/10610	5
BP	GO:0150146	cell junction disassembly	5/816	20/18862	0.00134858	0.0227665	0.0186924	9448/9922/3684/1524/712	5
BP	GO:0097193	intrinsic apoptotic signaling pathway	24/816	283/18862	0.00135021	0.0227665	0.0186924	602/8454/4318/6647/23604/6154/8876/2033/10625/1051/837/8451/6648/9647/5591/7132/3622/1032/23645/29108/11035/27141/5580/7133	24
BP	GO:0033673	negative regulation of kinase activity	23/816	267/18862	0.00137107	0.0229971	0.0188818	11213/5728/2629/10636/80851/5573/8660/1050/150290/9021/4067/5611/10221/9647/90007/5525/1032/9961/29108/57493/26524/5580/1843	23
BP	GO:0060491	regulation of cell projection assembly	18/816	188/18862	0.0013729	0.0229971	0.0188818	90410/83478/1785/5868/7454/9842/5337/391/81565/4117/10097/10602/55909/5880/2150/6624/3985/5580	18
BP	GO:0007009	plasma membrane organization	13/816	115/18862	0.00140954	0.0233809	0.0191969	5728/1785/6647/9788/8291/9885/1378/11252/55909/10211/51411/5580/4627	13
BP	GO:0030218	erythrocyte differentiation	13/816	115/18862	0.00140954	0.0233809	0.0191969	6688/2539/6774/3148/4067/604/10296/3059/5591/1432/3635/3304/7538	13
BP	GO:0043620	regulation of DNA-templated transcription in response to stress	13/816	115/18862	0.00140954	0.0233809	0.0191969	5721/10636/7311/2033/5686/5699/6233/1051/6195/22926/4851/5701/5691	13
BP	GO:0070482	response to oxygen levels	30/816	385/18862	0.00142311	0.0234639	0.019265	5351/5728/5721/5165/101/10533/8837/7311/7097/523/5894/2033/5686/5699/6233/80315/4851/57085/54890/6648/81/5058/5701/9114/4089/5691/6548/133/7048/22937	30
BP	GO:0051453	regulation of intracellular pH	11/816	88/18862	0.00142372	0.0234639	0.019265	528/6556/533/523/23315/526/51382/535/9114/6548/55647	11
BP	GO:0051495	positive regulation of cytoskeleton organization	20/816	220/18862	0.00144682	0.0237678	0.0195145	961/10456/389/7454/3055/10094/8851/10097/9525/10602/10552/3059/9647/2242/5058/2150/11151/29108/10300/3304	20
BP	GO:0007254	JNK cascade	18/816	189/18862	0.00145778	0.0238711	0.0195993	9770/9448/5911/7099/51135/6850/7311/4055/9043/6233/10221/28988/4296/2150/4616/29108/10044/11183	18
BP	GO:0031343	positive regulation of cell killing	9/816	63/18862	0.00147709	0.0240461	0.019743	3684/6850/4068/7305/383/8807/11126/2150/3133	9
BP	GO:0006623	protein targeting to vacuole	7/816	40/18862	0.00147788	0.0240461	0.019743	22879/79720/6272/7805/55048/64089/8031	7
BP	GO:0006672	ceramide metabolic process	12/816	102/18862	0.00150344	0.0242305	0.0198944	2629/9334/8439/8869/7903/5023/6483/9517/2529/7132/8703/5580	12
BP	GO:0045639	positive regulation of myeloid cell differentiation	12/816	102/18862	0.00150344	0.0242305	0.0198944	10456/7305/6774/3148/10221/3059/5591/2242/1432/3635/3304/920	12
BP	GO:0046620	regulation of organ growth	12/816	102/18862	0.00150344	0.0242305	0.0198944	5728/5594/10409/6647/9150/2539/4851/3720/1432/5058/26524/7048	12
BP	GO:1901532	regulation of hematopoietic progenitor cell differentiation	11/816	89/18862	0.00156242	0.0250253	0.020547	5721/5686/5699/4851/56339/5591/6655/5701/5008/5691/5977	11
BP	GO:0055022	negative regulation of cardiac muscle tissue growth	6/816	30/18862	0.00156745	0.0250253	0.020547	5728/9150/2539/3720/5058/7048	6
BP	GO:0061117	negative regulation of heart growth	6/816	30/18862	0.00156745	0.0250253	0.020547	5728/9150/2539/3720/5058/7048	6
BP	GO:0052126	movement in host environment	17/816	175/18862	0.00157528	0.0250719	0.0205853	27243/9972/79720/1378/81603/9525/9080/290/10581/4864/219931/3678/81559/2219/2060/3304/920	17
BP	GO:0031334	positive regulation of protein-containing complex assembly	22/816	254/18862	0.00160902	0.0255294	0.0209609	389/7454/3055/7099/10094/6850/8851/10097/3936/10602/10552/8451/10333/2242/5058/5701/6624/11151/29108/2932/19/3304	22
BP	GO:0046794	transport of virus	9/816	64/18862	0.00165412	0.0261638	0.0214817	3836/7311/9972/79720/6233/23633/55048/219931/2060	9
BP	GO:0002700	regulation of production of molecular mediator of immune response	15/816	146/18862	0.00167254	0.0263734	0.0216539	11213/7099/8809/383/1378/7805/604/11126/5591/2821/2150/3566/9984/7133/3133	15
BP	GO:0039702	viral budding via host ESCRT complex	5/816	21/18862	0.00170759	0.0268296	0.0220284	27243/79720/9525/55048/57132	5
BP	GO:0014068	positive regulation of phosphatidylinositol 3-kinase signaling	11/816	90/18862	0.00171197	0.0268296	0.0220284	10456/8660/2268/4067/5863/5293/3059/2150/10507/5008/55615	11
BP	GO:0034121	regulation of toll-like receptor signaling pathway	10/816	77/18862	0.00172884	0.0269289	0.0221099	11213/7099/7097/4067/7100/929/10211/10333/2150/285852	10
BP	GO:0060420	regulation of heart growth	10/816	77/18862	0.00172884	0.0269289	0.0221099	5728/5594/10409/9150/2539/4851/3720/1432/5058/7048	10
BP	GO:0007409	axonogenesis	34/816	460/18862	0.00173754	0.0269821	0.0221536	8650/2131/5728/1785/5594/9334/64218/9260/5595/8239/8660/391/6152/8851/9846/3326/5335/81565/8408/9046/5293/4851/10211/6277/5880/28988/26037/5058/6696/10507/4089/2932/9856/9252	34
BP	GO:0000956	nuclear-transcribed mRNA catabolic process	19/816	208/18862	0.00177828	0.0275251	0.0225994	6218/5520/6152/7311/6154/4849/6137/6138/6233/6741/9704/6136/55095/23381/22803/53918/5393/22849/7538	19
BP	GO:0002761	regulation of myeloid leukocyte differentiation	13/816	118/18862	0.00178328	0.0275251	0.0225994	10456/9770/7099/11025/7305/4067/1051/10221/3059/8451/2242/3635/920	13
BP	GO:0033008	positive regulation of mast cell activation involved in immune response	4/816	13/18862	0.00181744	0.0278838	0.022894	6850/9846/2268/3566	4
BP	GO:0043306	positive regulation of mast cell degranulation	4/816	13/18862	0.00181744	0.0278838	0.022894	6850/9846/2268/3566	4
BP	GO:0051090	regulation of DNA-binding transcription factor activity	33/816	444/18862	0.00184395	0.0282058	0.0231584	11213/5728/5594/28232/3055/1147/7099/101/5595/6850/1524/8809/8837/7311/7097/2319/6774/2033/6233/81603/10221/8807/3059/10211/10333/1432/29108/11035/6883/9252/3304/4792/25865	33
BP	GO:0002687	positive regulation of leukocyte migration	14/816	133/18862	0.00187276	0.0283111	0.0232448	5594/23604/5724/101/5595/1524/9943/728/63940/158747/5880/4267/2150/29108	14
BP	GO:0042157	lipoprotein metabolic process	14/816	133/18862	0.00187276	0.0283111	0.0232448	51304/2629/55062/84649/10533/84243/4836/84885/84992/285282/1509/65258/9140/131540	14
BP	GO:0050729	positive regulation of inflammatory response	14/816	133/18862	0.00187276	0.0283111	0.0232448	961/7099/101/1050/7097/1051/63940/7132/5008/64332/5603/51284/4792/3133	14
BP	GO:0048524	positive regulation of viral process	11/816	91/18862	0.001873	0.0283111	0.0232448	6732/9150/27243/5432/6827/79720/23633/9525/4851/81559/920	11
BP	GO:0046467	membrane lipid biosynthetic process	15/816	148/18862	0.00191447	0.0288526	0.0236893	2629/9334/8439/8869/7903/5023/6484/6483/9517/84992/7132/65258/8703/5580/25865	15
BP	GO:0010906	regulation of glucose metabolic process	13/816	119/18862	0.00192471	0.0289216	0.023746	5208/5509/10269/5165/8660/84649/2033/10295/10296/90007/5500/2932/51547	13
BP	GO:0062207	regulation of pattern recognition receptor signaling pathway	12/816	105/18862	0.00193102	0.0289314	0.023754	11213/51296/7099/7097/4067/7100/929/10211/10333/2150/3304/285852	12
BP	GO:0009615	response to virus	28/816	359/18862	0.00199089	0.0297412	0.0244189	602/2131/11213/1147/51311/10269/10533/3460/3459/6039/2268/3454/201294/5611/10625/3661/3455/10581/6041/1432/10623/2150/81559/29108/27350/11035/4953/51284	28
BP	GO:0030316	osteoclast differentiation	11/816	92/18862	0.00204615	0.0304775	0.0250235	126014/9770/7099/11025/9846/7305/1051/29887/1432/28962/3635	11
BP	GO:0044766	multi-organism transport	9/816	66/18862	0.00205909	0.0304925	0.0250358	3836/7311/9972/79720/6233/23633/55048/219931/2060	9
BP	GO:1902579	multi-organism localization	9/816	66/18862	0.00205909	0.0304925	0.0250358	3836/7311/9972/79720/6233/23633/55048/219931/2060	9
BP	GO:0042098	T cell proliferation	18/816	195/18862	0.00206599	0.0305062	0.0250471	6556/5573/6850/383/1378/5699/1051/8740/5880/6655/11151/29108/11035/7048/896/920/7133/3133	18
BP	GO:0010508	positive regulation of autophagy	13/816	120/18862	0.00207526	0.0305547	0.0250869	5899/5595/58476/8408/9517/10645/22926/81603/10241/207063/7942/9528/2932	13
BP	GO:0001910	regulation of leukocyte mediated cytotoxicity	10/816	79/18862	0.0021016	0.0306774	0.0251876	3684/4068/7305/383/1398/8807/11126/2150/11035/3133	10
BP	GO:0006826	iron ion transport	10/816	79/18862	0.0021016	0.0306774	0.0251876	1785/528/6556/533/523/51310/526/51382/535/9114	10
BP	GO:0090398	cellular senescence	10/816	79/18862	0.0021016	0.0306774	0.0251876	10269/6688/4215/604/5591/22846/1432/3622/4904/5580	10
BP	GO:0019083	viral transcription	17/816	180/18862	0.00213106	0.0308565	0.0253347	6218/9150/6152/22879/7311/5432/6154/6827/6137/9972/2033/6138/6233/81603/6136/81559/7538	17
BP	GO:0032727	positive regulation of interferon-alpha production	5/816	22/18862	0.00213199	0.0308565	0.0253347	1147/51311/7099/3661/51284	5
BP	GO:0001890	placenta development	14/816	135/18862	0.00215587	0.031114	0.0255461	5594/6647/5595/1050/3326/8728/9021/1051/23462/22846/1432/6696/7942/133	14
BP	GO:0044282	small molecule catabolic process	32/816	431/18862	0.00218051	0.0313809	0.0257653	55276/978/953/5728/10588/5208/131870/2639/5226/3101/8660/875/11057/39/5236/383/2710/10295/2529/2821/4521/2108/586/55825/79873/27350/23564/9583/51733/7263/3613/3295	32
BP	GO:0050870	positive regulation of T cell activation	19/816	212/18862	0.00221109	0.0316313	0.0259708	961/101/6850/2319/8876/1378/4067/604/11126/8740/5058/3566/11151/29108/64332/7048/7704/920/3133	19
BP	GO:0009266	response to temperature stimulus	20/816	228/18862	0.00221216	0.0316313	0.0259708	5594/6647/51316/3305/5595/3326/9972/2033/4067/5611/9658/6648/929/818/3310/2932/6548/133/3304/4792	20
BP	GO:0045648	positive regulation of erythrocyte differentiation	6/816	32/18862	0.00222267	0.0316313	0.0259708	6774/3148/5591/1432/3635/3304	6
BP	GO:1903902	positive regulation of viral life cycle	6/816	32/18862	0.00222267	0.0316313	0.0259708	27243/79720/23633/9525/81559/920	6
BP	GO:0048709	oligodendrocyte differentiation	11/816	93/18862	0.00223209	0.0316771	0.0260084	5728/9334/7097/9968/10100/4067/4851/23500/10419/7133/56978	11
BP	GO:0042692	muscle cell differentiation	28/816	362/18862	0.00224497	0.0317716	0.026086	90410/663/1495/1147/10269/9150/5573/8291/51177/8837/2539/9043/6272/23462/4851/6648/55909/10211/1432/5058/2314/3566/4089/11214/6548/133/4627/30008	28
BP	GO:0002526	acute inflammatory response	12/816	107/18862	0.00226792	0.0320077	0.0262799	2131/5005/101/8876/54210/5004/1051/2529/2161/5265/5008/3133	12
BP	GO:1901224	positive regulation of NIK/NF-kappaB signaling	9/816	67/18862	0.00228925	0.0322198	0.026454	7099/8809/7097/2033/7805/81/929/8740/51284	9
BP	GO:0045926	negative regulation of growth	21/816	245/18862	0.00230407	0.0322643	0.0264905	978/5728/64218/51316/9150/8851/2539/9043/604/4851/3720/5058/6696/1032/10507/4089/9856/7048/3304/6494/3300	21
BP	GO:0016052	carbohydrate catabolic process	18/816	197/18862	0.00231104	0.0322643	0.0264905	55276/2548/5209/5208/5509/5226/8972/3101/5236/9972/2033/2710/2529/5210/4126/2821/5500/5256	18
BP	GO:0016482	cytosolic transport	16/816	166/18862	0.00231136	0.0322643	0.0264905	5868/5594/57533/23095/55062/5595/9043/6272/7805/79585/10097/64089/10228/8677/11151/2060	16
BP	GO:0031647	regulation of protein stability	24/816	295/18862	0.0023459	0.0326572	0.0268131	5728/5594/9334/9770/149628/8239/9960/3326/284996/7305/2319/6907/2033/7375/92162/285282/5591/10211/54543/29108/10694/10910/5580/3304	24
BP	GO:0007599	hemostasis	27/816	346/18862	0.00235547	0.0327014	0.0268494	953/51317/2153/5868/5594/7454/7099/5573/5595/6850/5023/6484/5894/4067/7056/2161/5265/10451/57126/2821/7294/2150/966/1608/64780/5580/4627	27
BP	GO:0001912	positive regulation of leukocyte mediated cytotoxicity	8/816	55/18862	0.00237978	0.0329493	0.027053	3684/4068/7305/383/8807/11126/2150/3133	8
BP	GO:0019080	viral gene expression	18/816	198/18862	0.00244243	0.0336667	0.027642	6218/9150/6152/22879/7311/5432/6154/6827/6137/9972/2033/6138/6233/6741/81603/6136/81559/7538	18
BP	GO:0032611	interleukin-1 beta production	12/816	108/18862	0.00245352	0.0336667	0.027642	149628/5005/51311/7099/1992/1524/7305/6774/5004/10333/2150/29108	12
BP	GO:0002638	negative regulation of immunoglobulin production	4/816	14/18862	0.00245795	0.0336667	0.027642	1378/604/5591/9984	4
BP	GO:0051547	regulation of keratinocyte migration	4/816	14/18862	0.00245795	0.0336667	0.027642	5728/4318/9448/9922	4
BP	GO:0010611	regulation of cardiac muscle hypertrophy	9/816	68/18862	0.00253939	0.0345967	0.0284056	9150/2539/4851/3720/7132/5058/4089/6548/7133	9
BP	GO:1900015	regulation of cytokine production involved in inflammatory response	9/816	68/18862	0.00253939	0.0345967	0.0284056	7099/6774/7850/240/23633/63940/10333/1432/29108	9
BP	GO:0035821	modulation of process of other organism	13/816	123/18862	0.00258608	0.0351391	0.0288509	3836/9189/9150/10533/6850/3482/383/8408/2033/6256/2150/10910/920	13
BP	GO:0015868	purine ribonucleotide transport	5/816	23/18862	0.00262837	0.0353378	0.029014	961/6573/1378/293/79085	5
BP	GO:0042026	protein refolding	5/816	23/18862	0.00262837	0.0353378	0.029014	3305/2280/3310/3304/3300	5
BP	GO:0051503	adenine nucleotide transport	5/816	23/18862	0.00262837	0.0353378	0.029014	961/6573/1378/293/79085	5
BP	GO:0030148	sphingolipid biosynthetic process	12/816	109/18862	0.00265131	0.0355526	0.0291905	2629/9334/8439/8869/7903/5023/6483/9517/7132/8703/5580/25865	12
BP	GO:0032731	positive regulation of interleukin-1 beta production	8/816	56/18862	0.00267328	0.03566	0.0292786	149628/5005/51311/7099/7305/6774/5004/29108	8
BP	GO:0060760	positive regulation of response to cytokine stimulus	8/816	56/18862	0.00267328	0.03566	0.0292786	10555/7099/7097/7805/837/3661/7294/3304	8
BP	GO:0070302	regulation of stress-activated protein kinase signaling cascade	17/816	184/18862	0.00268618	0.0357388	0.0293433	5594/9770/9448/5911/10269/7099/5595/6688/4055/4067/4215/11342/4296/2150/4616/29108/1843	17
BP	GO:0006997	nucleus organization	13/816	124/18862	0.00277763	0.0368595	0.0302634	6732/5520/10269/27243/25909/81565/9972/3148/9525/57132/1861/79188/26993	13
BP	GO:0002534	cytokine production involved in inflammatory response	9/816	69/18862	0.00281072	0.037202	0.0305446	7099/6774/7850/240/23633/63940/10333/1432/29108	9
BP	GO:0042063	gliogenesis	23/816	283/18862	0.00289714	0.0382467	0.0314024	5728/2629/5594/9334/6647/7099/5595/1524/8851/7097/3459/9968/6774/10100/4067/728/4851/56339/23500/10419/712/7133/56978	23
BP	GO:0002822	regulation of adaptive immune response based on somatic recombination of immune receptors built from immunoglobulin superfamily domains	15/816	155/18862	0.00300216	0.0394794	0.0324145	7454/6556/8809/383/1378/604/2529/3566/64332/9984/11035/920/7133/81545/3133	15
BP	GO:0050792	regulation of viral process	17/816	186/18862	0.00300597	0.0394794	0.0324145	6732/9150/27243/5432/6827/79720/23633/81603/9525/4851/10581/6041/81559/27350/2219/920/7538	17
BP	GO:0046718	viral entry into host cell	14/816	140/18862	0.00302133	0.0394832	0.0324177	9972/1378/81603/9080/290/10581/4864/219931/3678/81559/2219/2060/3304/920	14
BP	GO:0001701	in utero embryonic development	26/816	335/18862	0.00302172	0.0394832	0.0324177	5594/1050/8178/5335/81565/4849/6137/9021/4836/1051/5954/23462/4851/27173/8451/22846/9654/7942/4089/689/57493/284723/133/7048/53918/4627	26
BP	GO:0002691	regulation of cellular extravasation	6/816	34/18862	0.00306541	0.0398504	0.0327191	5724/101/6484/2529/4267/11035	6
BP	GO:0010543	regulation of platelet activation	6/816	34/18862	0.00306541	0.0398504	0.0327191	7099/6850/4067/7056/7294/5580	6
BP	GO:0055021	regulation of cardiac muscle tissue growth	9/816	70/18862	0.00310445	0.0402554	0.0330516	5728/5594/9150/2539/4851/3720/1432/5058/7048	9
BP	GO:0050773	regulation of dendrite development	11/816	97/18862	0.0031176	0.0403236	0.0331076	5911/57580/57520/1398/10097/28988/26037/10507/2932/1608/9856	11
BP	GO:0048638	regulation of developmental growth	25/816	319/18862	0.00316753	0.040852	0.0335415	5728/1785/5594/10409/6647/64218/51316/10269/9150/8851/81565/2539/9043/4851/5591/3720/1432/28988/5058/6696/10507/2932/26524/9856/7048	25
BP	GO:1901214	regulation of neuron death	24/816	302/18862	0.00317445	0.040852	0.0335415	2629/6647/6418/10314/3684/7099/101/10533/1524/8851/3326/7305/2539/80315/1051/728/6648/10333/4296/11151/54434/2932/712/7133	24
BP	GO:0032612	interleukin-1 production	13/816	126/18862	0.00319551	0.0409153	0.0335934	149628/5005/51311/7099/1992/1524/7305/6774/7850/5004/10333/2150/29108	13
BP	GO:1902905	positive regulation of supramolecular fiber organization	18/816	203/18862	0.00319681	0.0409153	0.0335934	961/389/7454/3055/10094/8851/10097/10602/10552/9647/2242/5058/2150/11151/29108/10300/3304/30008	18
BP	GO:1900017	positive regulation of cytokine production involved in inflammatory response	5/816	24/18862	0.00320339	0.0409153	0.0335934	7099/6774/23633/63940/10333	5
BP	GO:0001574	ganglioside biosynthetic process	4/816	15/18862	0.00323802	0.0411518	0.0337876	9334/8869/7903/6483	4
BP	GO:0019321	pentose metabolic process	4/816	15/18862	0.00323802	0.0411518	0.0337876	6888/5226/7086/2539	4
BP	GO:0042326	negative regulation of phosphorylation	30/816	407/18862	0.00327776	0.0415535	0.0341174	11213/5728/2629/9770/10636/80851/5573/8660/1050/150290/9043/9021/4067/5611/10221/9647/90007/5591/64092/5525/1032/10507/9961/29108/57493/26524/64780/5580/10106/1843	30
BP	GO:0018212	peptidyl-tyrosine modification	28/816	372/18862	0.00330197	0.0417219	0.0342557	7039/660/10456/80851/3055/9625/5595/8460/6850/2268/6774/57410/9021/10645/4067/3059/64092/7297/4739/2242/7132/7294/10507/9961/3678/5008/5580/920	28
BP	GO:0002718	regulation of cytokine production involved in immune response	10/816	84/18862	0.00332103	0.0417219	0.0342557	11213/7099/8809/383/7805/604/11126/2150/7133/3133	10
BP	GO:0030101	natural killer cell activation	10/816	84/18862	0.00332103	0.0417219	0.0342557	2323/8809/7305/2268/201294/5293/285282/81609/11151/3133	10
BP	GO:0021782	glial cell development	12/816	112/18862	0.00332371	0.0417219	0.0342557	5728/9334/6647/7099/7097/3459/9968/10100/4067/728/712/56978	12
BP	GO:0015931	nucleobase-containing compound transport	21/816	253/18862	0.0033738	0.0422469	0.0346868	961/25909/9972/6573/1378/6741/293/54890/10211/79085/55508/9961/29074/1984/9984/23381/4904/7048/7263/26993/7538	21
BP	GO:0002706	regulation of lymphocyte mediated immunity	15/816	157/18862	0.00339278	0.0423807	0.0347966	7454/4068/8809/383/1378/604/1398/2529/8807/11126/9984/11035/7133/81545/3133	15
BP	GO:0007040	lysosome organization	9/816	71/18862	0.00342183	0.0424324	0.0348391	2548/2629/7805/7942/219931/8720/11151/19/55647	9
BP	GO:0014743	regulation of muscle hypertrophy	9/816	71/18862	0.00342183	0.0424324	0.0348391	9150/2539/4851/3720/7132/5058/4089/6548/7133	9
BP	GO:0080171	lytic vacuole organization	9/816	71/18862	0.00342183	0.0424324	0.0348391	2548/2629/7805/7942/219931/8720/11151/19/55647	9
BP	GO:0002285	lymphocyte activation involved in immune response	17/816	189/18862	0.00354442	0.0438461	0.0359998	602/64218/6556/7099/54518/3955/8809/6774/201294/1378/604/3936/2150/3566/11151/64332/9984	17
BP	GO:0001909	leukocyte mediated cytotoxicity	12/816	113/18862	0.0035762	0.0441324	0.0362349	3684/4068/7305/383/201294/1398/8807/11126/2150/11151/11035/3133	12
BP	GO:1900182	positive regulation of protein localization to nucleus	10/816	85/18862	0.00362159	0.0445848	0.0366063	5594/149628/3326/81603/3059/1432/3985/10694/5580/5296	10
BP	GO:0035966	response to topologically incorrect protein	18/816	206/18862	0.00373592	0.0458818	0.0376712	55062/3305/3326/54956/2137/2033/5611/22926/2161/1861/3310/23645/8720/9114/55284/3304/10106/3300	18
BP	GO:0014855	striated muscle cell proliferation	9/816	72/18862	0.00376416	0.0458976	0.0376842	3836/5728/5594/5573/8837/4851/3720/1432/7048	9
BP	GO:0030032	lamellipodium assembly	9/816	72/18862	0.00376416	0.0458976	0.0376842	3983/1785/7454/10097/55909/10451/5880/221178/6624	9
BP	GO:0048708	astrocyte differentiation	9/816	72/18862	0.00376416	0.0458976	0.0376842	5594/7099/5595/3459/6774/10100/728/4851/712	9
BP	GO:0010498	proteasomal protein catabolic process	34/816	483/18862	0.00378803	0.0460787	0.0378329	26234/84961/8454/2629/5721/1050/7311/3326/9184/57520/7844/6907/5686/5699/6233/10221/79699/1453/10296/8451/254170/11011/23304/1861/130617/5701/222235/2932/5691/55284/5887/3304/81545/3300	34
BP	GO:0034614	cellular response to reactive oxygen species	15/816	159/18862	0.00382416	0.0464077	0.038103	4318/1785/5594/6647/1147/5595/8837/383/10645/1398/8807/6648/5603/11035/5580	15
BP	GO:0009409	response to cold	7/816	47/18862	0.00383849	0.0464272	0.0381189	51316/5611/9658/6648/6548/133/4792	7
BP	GO:0048675	axon extension	12/816	114/18862	0.00384394	0.0464272	0.0381189	1785/64218/8239/8851/3326/81565/8408/28988/5058/10507/2932/9856	12
BP	GO:0015865	purine nucleotide transport	5/816	25/18862	0.0038637	0.0464463	0.0381346	961/6573/1378/293/79085	5
BP	GO:0031579	membrane raft organization	5/816	25/18862	0.0038637	0.0464463	0.0381346	2319/11252/10211/4864/4118	5
BP	GO:0010675	regulation of cellular carbohydrate metabolic process	14/816	144/18862	0.00390268	0.0468047	0.038429	5208/5509/10269/5165/5724/8660/84649/2033/10295/10296/90007/5500/2932/51547	14
BP	GO:0055072	iron ion homeostasis	10/816	86/18862	0.00394331	0.0471812	0.038738	26234/8454/79901/6647/6556/523/51310/9114/4089/8031	10
BP	GO:0007596	blood coagulation	26/816	342/18862	0.00397728	0.0474765	0.0389805	953/51317/2153/5868/5594/7454/7099/5573/5595/6850/5023/6484/5894/4067/7056/2161/5265/10451/57126/7294/2150/966/1608/64780/5580/4627	26
BP	GO:0036293	response to decreased oxygen levels	27/816	360/18862	0.00405806	0.0483278	0.0396794	5351/5728/5721/5165/101/8837/7311/7097/5894/2033/5686/5699/6233/80315/4851/57085/54890/6648/81/5058/5701/4089/5691/6548/133/7048/22937	27
BP	GO:0006691	leukotriene metabolic process	6/816	36/18862	0.00412615	0.048844	0.0401033	241/6850/7097/240/64174/4259	6
BP	GO:0007569	cell aging	12/816	115/18862	0.00412756	0.048844	0.0401033	5728/6647/10269/6688/4215/604/5591/22846/1432/3622/4904/5580	12
BP	GO:0032653	regulation of interleukin-10 production	8/816	60/18862	0.00413965	0.048844	0.0401033	602/961/7099/6850/7097/7305/6774/29108	8
BP	GO:0090342	regulation of cell aging	8/816	60/18862	0.00413965	0.048844	0.0401033	5728/10269/4215/604/5591/22846/3622/4904	8
BP	GO:0071901	negative regulation of protein serine/threonine kinase activity	14/816	145/18862	0.00415289	0.0488764	0.0401299	11213/5728/2629/10636/5573/1050/150290/4067/1032/29108/57493/26524/5580/1843	14
BP	GO:0051014	actin filament severing	4/816	16/18862	0.00417109	0.0488764	0.0401299	6840/752/2314/4627	4
BP	GO:0070431	nucleotide-binding oligomerization domain containing 2 signaling pathway	4/816	16/18862	0.00417109	0.0488764	0.0401299	51296/7099/3304/4792	4
BP	GO:1900180	regulation of protein localization to nucleus	13/816	130/18862	0.00418483	0.0489252	0.0401699	5594/149628/1495/3326/81603/3059/1432/3985/2932/10694/26524/5580/5296	13
BP	GO:0043687	post-translational protein modification	27/816	361/18862	0.00421171	0.0491269	0.0403356	10970/26234/23287/84961/2153/8454/5868/5721/5861/10533/56929/9903/9021/5686/5699/5611/5954/8451/5265/6696/5701/222235/8720/5691/5876/7704/9140	27
BP	GO:0045621	positive regulation of lymphocyte differentiation	11/816	101/18862	0.00426556	0.0496352	0.0407529	101/6850/8876/1378/604/5591/3566/64332/3635/7048/7704	11
BP	GO:0060560	developmental growth involved in morphogenesis	19/816	225/18862	0.00427471	0.0496352	0.0407529	2131/1785/64218/8239/8851/3326/81565/9968/8408/9043/4851/55909/28988/5058/6696/10507/2932/9856/7048	19
CC	GO:0101002	ficolin-1-rich granule	40/836	185/19520	1.27753e-17	7.25637e-15	5.86319e-15	55276/978/338339/79930/2548/51646/4318/5594/124583/6556/8972/3101/51719/101/25797/10533/3326/116844/5236/83716/2357/1378/5686/240/6515/10097/5265/535/1432/28988/2821/3310/5701/9961/51411/1509/3614/10694/2219/3304	40
CC	GO:1904813	ficolin-1-rich granule lumen	30/836	124/19520	6.06814e-15	1.72335e-12	1.39248e-12	55276/978/51646/4318/5594/124583/3101/51719/25797/10533/3326/116844/5236/83716/5686/240/10097/5265/1432/28988/2821/3310/5701/9961/51411/1509/3614/10694/2219/3304	30
CC	GO:0030667	secretory granule membrane	47/836	305/19520	2.06528e-14	3.91026e-12	3.15952e-12	338339/79930/2548/10970/961/199675/11031/134957/10555/8694/6556/8972/3684/5724/101/27180/5337/391/11025/762/7097/9545/7305/5023/3482/64386/2357/353189/8876/53831/1378/53917/57153/6515/728/1084/290/51382/929/23200/11010/158747/4126/57126/535/966/7133	47
CC	GO:0042581	specific granule	32/836	160/19520	2.30035e-13	3.2665e-11	2.63935e-11	8993/338339/10970/961/199675/126014/124583/10555/8694/5005/3684/101/25797/5337/5023/116844/383/64386/353189/53831/57153/5004/311/6515/1084/51382/54472/158747/57126/966/1509/7133	32
CC	GO:0005774	vacuolar membrane	53/836	431/19520	4.72628e-12	5.36905e-10	4.33823e-10	2548/10970/51296/2629/79901/528/206358/9842/2783/55062/51311/5337/533/89849/9516/7311/3326/9545/523/58528/8408/2357/353189/9043/8876/6272/57153/51310/7805/11342/526/7056/10241/290/51382/23200/11010/10211/23531/4126/535/3117/7942/1175/4864/219931/9528/9114/1509/28962/9583/3126/51284	53
CC	GO:0034774	secretory granule lumen	44/836	322/19520	9.63788e-12	9.12386e-10	7.37213e-10	8993/55276/978/2153/126014/5594/124583/51316/5005/3101/51719/25797/1992/10533/3326/2268/116844/383/83716/201294/5686/5004/5611/240/410/10097/54472/81/5265/3959/1432/28988/2821/3310/5701/9961/51411/1509/29108/3614/10694/8635/2219/5580	44
CC	GO:0070820	tertiary granule	30/836	164/19520	1.41086e-11	1.04094e-09	8.41089e-10	8993/978/338339/79930/2548/961/199675/51646/4318/126014/124583/6556/8972/3684/5724/101/25797/5337/116844/5236/2357/53831/1378/5004/6515/57126/535/28988/966/1509	30
CC	GO:0060205	cytoplasmic vesicle lumen	44/836	326/19520	1.46612e-11	1.04094e-09	8.41089e-10	8993/55276/978/2153/126014/5594/124583/51316/5005/3101/51719/25797/1992/10533/3326/2268/116844/383/83716/201294/5686/5004/5611/240/410/10097/54472/81/5265/3959/1432/28988/2821/3310/5701/9961/51411/1509/29108/3614/10694/8635/2219/5580	44
CC	GO:0031983	vesicle lumen	44/836	328/19520	1.80307e-11	1.13794e-09	9.1946e-10	8993/55276/978/2153/126014/5594/124583/51316/5005/3101/51719/25797/1992/10533/3326/2268/116844/383/83716/201294/5686/5004/5611/240/410/10097/54472/81/5265/3959/1432/28988/2821/3310/5701/9961/51411/1509/29108/3614/10694/8635/2219/5580	44
CC	GO:0045335	phagocytic vesicle	27/836	136/19520	2.06361e-11	1.17213e-09	9.47086e-10	8993/1785/5868/11031/7454/6556/101/533/6850/10981/7097/311/4689/7791/752/10333/535/5880/10228/339122/9114/11151/19/51284/9140/3133/55647	27
CC	GO:0035579	specific granule membrane	21/836	91/19520	1.85928e-10	9.60067e-09	7.7574e-09	338339/10970/961/199675/10555/8694/3684/101/5337/5023/64386/353189/53831/57153/6515/1084/51382/158747/57126/966/7133	21
CC	GO:0030139	endocytic vesicle	40/836	307/19520	3.66778e-10	1.73608e-08	1.40276e-08	8993/1785/5868/11031/7454/6556/9788/101/8291/5337/533/6850/7311/10981/7097/2319/3482/53917/6233/311/4689/7791/752/10333/535/5880/3117/10228/339122/818/1175/9114/79890/11151/19/3126/51284/9140/3133/55647	40
CC	GO:0005765	lysosomal membrane	44/836	378/19520	1.82338e-09	7.3977e-08	5.97739e-08	2548/10970/51296/2629/79901/528/206358/9842/2783/51311/5337/9516/7311/3326/9545/523/2357/353189/9043/8876/6272/57153/7805/11342/526/290/51382/23200/11010/10211/23531/4126/535/3117/7942/1175/4864/219931/9528/9114/1509/28962/3126/51284	44
CC	GO:0098852	lytic vacuole membrane	44/836	378/19520	1.82338e-09	7.3977e-08	5.97739e-08	2548/10970/51296/2629/79901/528/206358/9842/2783/51311/5337/9516/7311/3326/9545/523/2357/353189/9043/8876/6272/57153/7805/11342/526/290/51382/23200/11010/10211/23531/4126/535/3117/7942/1175/4864/219931/9528/9114/1509/28962/3126/51284	44
CC	GO:0005925	focal adhesion	44/836	416/19520	3.34266e-08	1.26575e-06	1.02274e-06	83478/8650/1785/5594/6218/9448/1495/3055/2783/9260/5595/54518/10094/391/6840/2319/6503/3482/4082/10097/23092/7791/3936/8500/3927/11252/81/10211/6136/9019/4739/2242/5880/4267/5058/2314/5500/3678/966/6548/3304/25996/4627/4026	44
CC	GO:0005766	primary lysosome	24/836	155/19520	4.62646e-08	1.54578e-06	1.249e-06	2548/10970/5594/51316/5005/9545/383/2357/353189/201294/8876/5611/311/410/10097/54472/23200/11010/4126/29108/3614/10694/8635/5580	24
CC	GO:0042582	azurophil granule	24/836	155/19520	4.62646e-08	1.54578e-06	1.249e-06	2548/10970/5594/51316/5005/9545/383/2357/353189/201294/8876/5611/311/410/10097/54472/23200/11010/4126/29108/3614/10694/8635/5580	24
CC	GO:0030055	cell-substrate junction	44/836	423/19520	5.44845e-08	1.71929e-06	1.3892e-06	83478/8650/1785/5594/6218/9448/1495/3055/2783/9260/5595/54518/10094/391/6840/2319/6503/3482/4082/10097/23092/7791/3936/8500/3927/11252/81/10211/6136/9019/4739/2242/5880/4267/5058/2314/5500/3678/966/6548/3304/25996/4627/4026	44
CC	GO:0030670	phagocytic vesicle membrane	16/836	77/19520	1.31012e-07	3.91658e-06	3.16462e-06	1785/5868/11031/6556/533/10981/7097/10333/535/5880/339122/9114/11151/9140/3133/55647	16
CC	GO:0019898	extrinsic component of membrane	34/836	304/19520	3.32504e-07	9.44312e-06	7.6301e-06	8650/7053/2629/134957/1495/3055/2783/55062/6850/2787/2771/9885/2268/6503/8408/9021/4836/4067/29887/57655/5293/64089/2280/11252/6277/2242/1861/2793/94120/2802/2790/2219/4118/5296	34
CC	GO:0001726	ruffle	24/836	175/19520	4.73611e-07	1.281e-05	1.03506e-05	660/1785/5868/9260/9788/7099/51177/5335/2268/526/121512/3936/11252/64092/6277/28988/5058/221178/6624/23550/3678/10044/89846/4627	24
CC	GO:0031252	cell leading edge	40/836	411/19520	1.22715e-06	3.16828e-05	2.55999e-05	660/10456/3983/1785/5868/51225/1495/9260/9788/7099/54518/10094/51177/5335/81565/2319/2268/526/121512/10097/3936/11252/10211/64092/57126/6277/4739/5880/28988/5058/221178/6624/23550/3678/11151/54434/10044/89846/6548/4627	40
CC	GO:0045121	membrane raft	34/836	323/19520	1.35238e-06	3.20064e-05	2.58614e-05	1820/5868/5594/1495/3055/3684/5573/5595/8837/7097/5023/2319/2771/10287/1378/4067/962/1398/1241/11252/929/10211/10333/57126/7132/4864/1509/3635/19/6548/4118/7048/920/7133	34
CC	GO:0098857	membrane microdomain	34/836	323/19520	1.35238e-06	3.20064e-05	2.58614e-05	1820/5868/5594/1495/3055/3684/5573/5595/8837/7097/5023/2319/2771/10287/1378/4067/962/1398/1241/11252/929/10211/10333/57126/7132/4864/1509/3635/19/6548/4118/7048/920/7133	34
CC	GO:0030666	endocytic vesicle membrane	22/836	163/19520	1.85106e-06	4.2056e-05	3.39815e-05	1785/5868/11031/6556/533/7311/10981/7097/6233/10333/535/5880/3117/339122/818/1175/9114/11151/3126/9140/3133/55647	22
CC	GO:0070821	tertiary granule membrane	14/836	73/19520	2.20311e-06	4.81295e-05	3.88889e-05	338339/2548/961/199675/6556/8972/3684/5724/101/5337/53831/6515/57126/966	14
CC	GO:1904724	tertiary granule lumen	12/836	55/19520	2.8224e-06	5.93749e-05	4.79753e-05	8993/978/51646/4318/126014/124583/25797/116844/5236/5004/28988/1509	12
CC	GO:0098562	cytoplasmic side of membrane	23/836	191/19520	7.7476e-06	0.000157166	0.000126991	7053/5728/5868/3055/2783/1147/6850/2787/52/9516/2771/9885/2268/6503/2539/4067/57655/2280/6277/2242/2793/2790/4627	23
CC	GO:0009898	cytoplasmic side of plasma membrane	21/836	167/19520	9.73863e-06	0.000190743	0.000154121	7053/5728/3055/2783/1147/6850/2787/52/9516/2771/9885/2268/6503/2539/4067/57655/6277/2242/2793/2790/4627	21
CC	GO:0030027	lamellipodium	23/836	196/19520	1.18965e-05	0.00022524	0.000181995	10456/3983/1785/51225/1495/54518/10094/5335/2319/121512/10097/10211/57126/4739/5880/28988/5058/221178/6624/11151/54434/89846/6548	23
CC	GO:0031234	extrinsic component of cytoplasmic side of plasma membrane	15/836	100/19520	2.23606e-05	0.000409704	0.000331043	7053/3055/2783/6850/2787/2771/9885/2268/6503/4067/57655/6277/2242/2793/2790	15
CC	GO:0035578	azurophil granule lumen	14/836	91/19520	3.11711e-05	0.000553287	0.000447059	5594/51316/5005/383/201294/5611/410/10097/54472/29108/3614/10694/8635/5580	14
CC	GO:0019897	extrinsic component of plasma membrane	20/836	169/19520	3.83781e-05	0.000660569	0.000533744	8650/7053/134957/1495/3055/2783/6850/2787/2771/9885/2268/6503/4067/57655/6277/2242/2793/94120/2790/2219	20
CC	GO:0005775	vacuolar lumen	20/836	173/19520	5.36671e-05	0.000896556	0.000724422	2548/2629/5594/51316/5005/23604/383/201294/5611/410/10097/54472/4126/1509/29108/3988/3614/10694/8635/5580	20
CC	GO:0005635	nuclear envelope	38/836	462/19520	9.81259e-05	0.00159244	0.0012867	10456/3836/663/241/3930/10269/9189/5595/27243/25909/5023/81565/894/3482/9972/54956/6272/311/11342/240/22926/10553/23200/6277/5880/1861/5730/5058/23534/4864/79188/9961/4521/51230/1984/4259/4904/3300	38
CC	GO:0033176	proton-transporting V-type ATPase complex	7/836	27/19520	0.000107867	0.0017019	0.00137515	528/533/523/526/51382/535/9114	7
CC	GO:0008180	COP9 signalosome	8/836	36/19520	0.000113814	0.0017472	0.00141175	10409/3305/3326/5335/10211/3310/3304/4627	8
CC	GO:0002102	podosome	7/836	28/19520	0.000138542	0.00207083	0.00167324	101/6840/10097/3936/28988/6624/51411	7
CC	GO:0030496	midbody	20/836	193/19520	0.000242539	0.00346719	0.00280151	602/51646/5899/1785/5911/9150/2079/9960/6840/2771/4117/79720/311/22924/9525/57132/54434/10300/64780/22849	20
CC	GO:0101003	ficolin-1-rich granule membrane	10/836	61/19520	0.000244168	0.00346719	0.00280151	338339/79930/2548/6556/8972/101/2357/1378/6515/535	10
CC	GO:0035580	specific granule lumen	10/836	62/19520	0.000280113	0.00388059	0.00313554	8993/126014/124583/5005/25797/116844/383/5004/54472/1509	10
CC	GO:0031902	late endosome membrane	16/836	140/19520	0.000331875	0.00448822	0.00362651	54432/6556/5337/27243/9516/114883/79720/11342/9525/55048/64089/57132/23531/4864/9528/3126	16
CC	GO:0005770	late endosome	25/836	275/19520	0.000341345	0.00450893	0.00364324	54432/5594/1318/6556/5573/5595/8291/5337/27243/9516/22879/3482/114883/3454/201294/79720/11342/9525/55048/64089/57132/23531/4864/9528/3126	25
CC	GO:0005769	early endosome	31/836	378/19520	0.000438678	0.00566294	0.00457569	8650/5868/5594/11031/5861/7099/5595/8291/23295/9516/10981/3482/27342/6272/64089/11252/23200/10211/81609/28988/55654/10228/2150/9114/79890/11151/115825/9856/2060/920/3133	31
CC	GO:0035577	azurophil granule membrane	9/836	58/19520	0.000750243	0.00944988	0.00763556	2548/10970/9545/2357/353189/8876/23200/11010/4126	9
CC	GO:0031143	pseudopodium	5/836	18/19520	0.000765307	0.00944988	0.00763556	5594/5595/5894/81/2150	5
CC	GO:0001891	phagocytic cup	6/836	27/19520	0.000828272	0.0100098	0.00808794	1785/11031/7099/3936/51411/11151	6
CC	GO:0030135	coated vesicle	25/836	295/19520	0.000954116	0.0112542	0.00909347	7039/8650/10456/2153/1785/5868/55062/57222/3482/57410/10287/201294/6272/9276/5265/28988/3117/10228/1175/966/3126/9856/920/3133/22937	25
CC	GO:0005776	autophagosome	12/836	98/19520	0.000970874	0.0112542	0.00909347	57533/55062/23604/89849/58476/8408/53917/57655/10241/8031/9583/9140	12
CC	GO:0032009	early phagosome	4/836	12/19520	0.00125483	0.0142549	0.011518	5868/11031/6850/51284	4
CC	GO:0008287	protein serine/threonine phosphatase complex	8/836	51/19520	0.0013593	0.0148478	0.0119971	5509/5520/5534/5531/5525/5514/5500/23645	8
CC	GO:1903293	phosphatase complex	8/836	51/19520	0.0013593	0.0148478	0.0119971	5509/5520/5534/5531/5525/5514/5500/23645	8
CC	GO:0016605	PML body	12/836	103/19520	0.001505	0.0161291	0.0130324	5728/10409/10636/9189/58476/2872/81603/10241/7156/7704/4034/26993	12
CC	GO:0030864	cortical actin cytoskeleton	10/836	78/19520	0.00177307	0.0186501	0.0150694	2319/10097/10296/3059/3927/10211/28988/11151/11214/4627	10
CC	GO:0031300	intrinsic component of organelle membrane	30/836	402/19520	0.00236669	0.0244415	0.0197488	2131/5868/3930/10269/94097/84649/8460/3955/5023/84255/57222/4580/51310/55288/22926/57655/92960/27235/3117/10228/4864/79188/8677/9583/100287932/3126/54968/54927/3133/3300	30
CC	GO:0032587	ruffle membrane	11/836	95/19520	0.00244955	0.0248455	0.0200753	660/1785/51177/2268/3936/11252/5058/221178/23550/3678/10044	11
CC	GO:0044853	plasma membrane raft	12/836	111/19520	0.00284679	0.028368	0.0229215	5594/1495/3055/3684/5573/5595/2319/1378/11252/10211/57126/7048	12
CC	GO:0034399	nuclear periphery	13/836	128/19520	0.00336792	0.0329824	0.02665	10409/6732/25909/9972/26502/240/1051/10296/6041/5885/9984/5580/26993	13
CC	GO:0030136	clathrin-coated vesicle	17/836	192/19520	0.00376847	0.0362795	0.0293141	7039/8650/10456/1785/5868/55062/3482/10287/201294/6272/28988/3117/10228/1175/3126/9856/920	17
CC	GO:0032432	actin filament bundle	9/836	73/19520	0.00387165	0.0366516	0.0296147	3983/9260/4082/7791/3936/81/6624/4627/4026	9
CC	GO:0000502	proteasome complex	8/836	62/19520	0.00478021	0.0445108	0.035965	5721/5686/5699/130617/5701/5691/5887/3300	8
CC	GO:0031301	integral component of organelle membrane	27/836	371/19520	0.00531337	0.0486773	0.0393316	2131/3930/10269/94097/84649/8460/3955/5023/84255/57222/4580/51310/55288/22926/92960/27235/3117/10228/4864/79188/8677/9583/100287932/3126/54968/54927/3133	27
MF	GO:0004674	protein serine/threonine kinase activity	46/831	430/18337	6.05483e-08	5.43119e-05	4.97771e-05	11213/5594/9448/8569/6732/1147/5165/23604/9625/5595/51135/6850/2872/8408/23031/4117/5894/10645/2870/4215/6195/9943/10295/1453/10553/81788/11011/5591/1432/4296/5613/5058/818/5256/11214/3985/2932/5603/11035/26524/9252/7048/5580/11183/896/25865	46
MF	GO:0038187	pattern recognition receptor activity	9/831	23/18337	3.55536e-07	0.000159458	0.000146144	8993/51311/7099/5724/26253/7097/929/2219/51284	9
MF	GO:0004722	protein serine/threonine phosphatase activity	16/831	101/18337	1.18422e-05	0.00315474	0.00289134	5728/5509/9150/5534/132160/150290/85464/9647/134510/5531/818/5500/5537/54434/10106/1843	16
MF	GO:0106306	protein serine phosphatase activity	13/831	72/18337	1.83908e-05	0.00315474	0.00289134	5728/9150/132160/150290/85464/9647/134510/5531/5500/5537/54434/10106/1843	13
MF	GO:0106307	protein threonine phosphatase activity	13/831	72/18337	1.83908e-05	0.00315474	0.00289134	5728/9150/132160/150290/85464/9647/134510/5531/5500/5537/54434/10106/1843	13
MF	GO:0001784	phosphotyrosine residue binding	10/831	44/18337	2.1102e-05	0.00315474	0.00289134	5594/3055/5595/6850/2268/9021/1398/64092/10044/5296	10
MF	GO:0106310	protein serine kinase activity	27/831	249/18337	2.5452e-05	0.00321942	0.00295061	11213/9448/8569/6732/23604/9625/51135/2872/8408/23031/4117/5894/6195/9943/1453/81788/11011/5591/5613/5058/3985/2932/11035/26524/9252/5580/11183	27
MF	GO:0004715	non-membrane spanning protein tyrosine kinase activity	10/831	46/18337	3.19334e-05	0.00321942	0.00295061	660/3055/6850/2268/6503/4067/7297/2242/7294/5580	10
MF	GO:0016791	phosphatase activity	28/831	276/18337	6.02918e-05	0.0047331	0.00433791	5209/5728/5208/131870/5509/5791/9150/5534/132160/52/150290/85464/5210/249/9647/134510/51205/5531/5525/818/5500/5537/54434/3635/10106/11284/3613/1843	28
MF	GO:0106311	protein threonine kinase activity	26/831	248/18337	6.33191e-05	0.0047331	0.00433791	11213/9448/8569/6732/23604/9625/51135/2872/8408/23031/4117/5894/6195/9943/1453/81788/11011/5591/5613/5058/3985/2932/11035/26524/9252/11183	26
MF	GO:0051219	phosphoprotein binding	13/831	87/18337	0.000141938	0.00885002	0.00811109	5594/3055/5595/6850/2268/3482/9021/4067/1398/64092/10044/8535/5296	13
MF	GO:0140375	immune receptor activity	17/831	136/18337	0.000142477	0.00885002	0.00811109	1524/8809/3460/3459/3454/2357/1378/3597/7850/728/8807/11126/3455/3117/3566/1441/920	17
MF	GO:0042578	phosphoric ester hydrolase activity	33/831	367/18337	0.000147994	0.00885002	0.00811109	5209/5728/5208/131870/5509/5791/9150/5534/5337/132160/52/5335/79153/150290/85464/5210/249/9647/134510/51205/5531/5525/818/5500/5537/54434/3635/65258/5140/10106/11284/3613/1843	33
MF	GO:0030695	GTPase regulator activity	39/831	467/18337	0.00018483	0.00976368	0.00894846	83478/663/7454/134957/57533/10636/26286/80851/80005/9922/51291/64786/57580/79961/84986/27342/22898/397/1933/5863/121512/23092/63940/10451/6655/4650/26037/55843/221178/23550/79890/11214/10044/89846/64407/201176/55357/5922/6494	39
MF	GO:0045309	protein phosphorylated amino acid binding	10/831	56/18337	0.000185167	0.00976368	0.00894846	5594/3055/5595/6850/2268/9021/1398/64092/10044/5296	10
MF	GO:0051020	GTPase binding	23/831	222/18337	0.000195927	0.00976368	0.00894846	90410/7454/6647/2783/58528/8408/27342/201294/397/121512/3936/752/4650/55654/5058/23534/79890/11214/89846/5876/19/4904/64780	23
MF	GO:0017110	nucleoside-diphosphatase activity	5/831	14/18337	0.000268475	0.0126749	0.0116166	953/124583/131870/79873/9583	5
MF	GO:0003924	GTPase activity	29/831	322/18337	0.000355338	0.0159369	0.0146062	5899/1785/5868/11031/389/10636/5861/2783/5911/6016/391/2787/10981/9545/58528/2771/10287/53917/397/55288/285282/5880/9609/339122/2793/4521/64407/2790/55647	29
MF	GO:0003779	actin binding	36/831	439/18337	0.000454232	0.0180412	0.0165349	3983/9168/7454/1495/9260/9788/10094/8851/6840/22921/4082/85464/79585/4542/121512/10097/3936/10296/7136/10552/3059/3927/23500/752/81/22846/28988/4650/221692/2314/6624/11151/54434/64780/6275/4627	36
MF	GO:0015078	proton transmembrane transporter activity	15/831	124/18337	0.000491393	0.0180412	0.0165349	528/206358/1345/6556/533/523/23315/55002/1528/526/57210/51382/535/9114/6548	15
MF	GO:0004721	phosphoprotein phosphatase activity	19/831	179/18337	0.000505858	0.0180412	0.0165349	5728/5509/5791/9150/5534/132160/52/150290/85464/9647/134510/5531/5525/818/5500/5537/54434/10106/1843	19
MF	GO:0051015	actin filament binding	21/831	208/18337	0.000516069	0.0180412	0.0165349	3983/1495/10094/8851/6840/4082/79585/4542/10097/3936/10552/3059/3927/752/81/28988/2314/6624/11151/64780/4627	21
MF	GO:0003953	NAD+ nucleosidase activity	5/831	16/18337	0.000543046	0.0180412	0.0165349	7099/8809/7097/8807/10333	5
MF	GO:0050135	NAD(P)+ nucleosidase activity	5/831	16/18337	0.000543046	0.0180412	0.0165349	7099/8809/7097/8807/10333	5
MF	GO:0031625	ubiquitin protein ligase binding	26/831	293/18337	0.000873878	0.0279953	0.0256578	8454/5899/149628/5573/3305/875/7311/3326/4055/4067/6233/7805/1398/10221/8451/54472/2821/3310/2932/23381/55284/10628/3304/92714/7133/4792	26
MF	GO:0044389	ubiquitin-like protein ligase binding	27/831	312/18337	0.00102373	0.031318	0.0287031	8454/5899/149628/5573/3305/875/7311/3326/4055/4067/6233/7805/1051/1398/10221/8451/54472/2821/3310/2932/23381/55284/10628/3304/92714/7133/4792	27
MF	GO:0031267	small GTPase binding	19/831	190/18337	0.00104743	0.031318	0.0287031	90410/7454/6647/8408/27342/201294/397/121512/752/4650/55654/5058/23534/79890/11214/89846/5876/19/64780	19
MF	GO:0019902	phosphatase binding	19/831	193/18337	0.00126164	0.036506	0.033458	5594/6647/5509/5520/5595/8660/5534/6850/8178/6774/29888/1432/221692/9961/23645/23381/6548/54927/5296	19
MF	GO:0004896	cytokine receptor activity	12/831	97/18337	0.00143439	0.0402078	0.0368507	1524/8809/3460/3459/3454/3597/7850/8807/3455/3566/1441/920	12
MF	GO:0035325	Toll-like receptor binding	4/831	12/18337	0.00154774	0.0420705	0.0385578	6850/7097/54472/10333	4
MF	GO:0051787	misfolded protein binding	6/831	29/18337	0.00165031	0.0435392	0.0399039	3305/5611/2161/1861/3310/3304	6
